# Supplementary material for: Synthesis of 2,3-dihydro-4-pyranones from epoxides via intermolecular [4+2] cycloaddition reaction
Source: Royal Society of Chemistry journal article supplement (doi:10.1039/c2ra21468g), 2012-01-01

## **Supplementary Information**

### **Synthesis of 2,3-Dihydro-4-pyranones from Epoxides via Intermolecular [4+2] Cycloaddition Reaction**

Kiran Indukuri, Somasekhar Bondalapati, Sabera Sultana and Anil K. Saikia\*

## Experimental Section

### General

All the reagents are commercially obtained.  $\text{BF}_3 \cdot \text{Et}_2\text{O}$  was distilled over  $\text{CaH}_2$  prior to use.  $^1\text{H}$  NMR spectra were recorded in  $\text{CDCl}_3$  on Varian AS 400 (400 MHz) spectrometer using TMS as internal standard. The  $^{13}\text{C}$  spectra were obtained on Varian AS 400 operating at 100 MHz. IR spectra were recorded on Nicolet Impact 410 FT-IR spectrometer. HRMS spectra were recorded using ESI mode. Melting points were measured in open capillary tubes and are uncorrected. All 3-ethoxy cyclobutanones are prepared by the following literature methods.

Ref:

- 1) J.-i. Matsuo, R. Okuno, K. Takeuchi, M. Kawano and H. Ishibashi, *Tetrahedron Lett.* 2010, **51**, 3736.
- 2) J.-i. Matsuo, S. Sasaki, H. Tanaka and H. Ishibashi, *J. Am. Chem. Soc.* 2008, **130**, 11600.



### <sup>13</sup>C NMR spectrum of 1

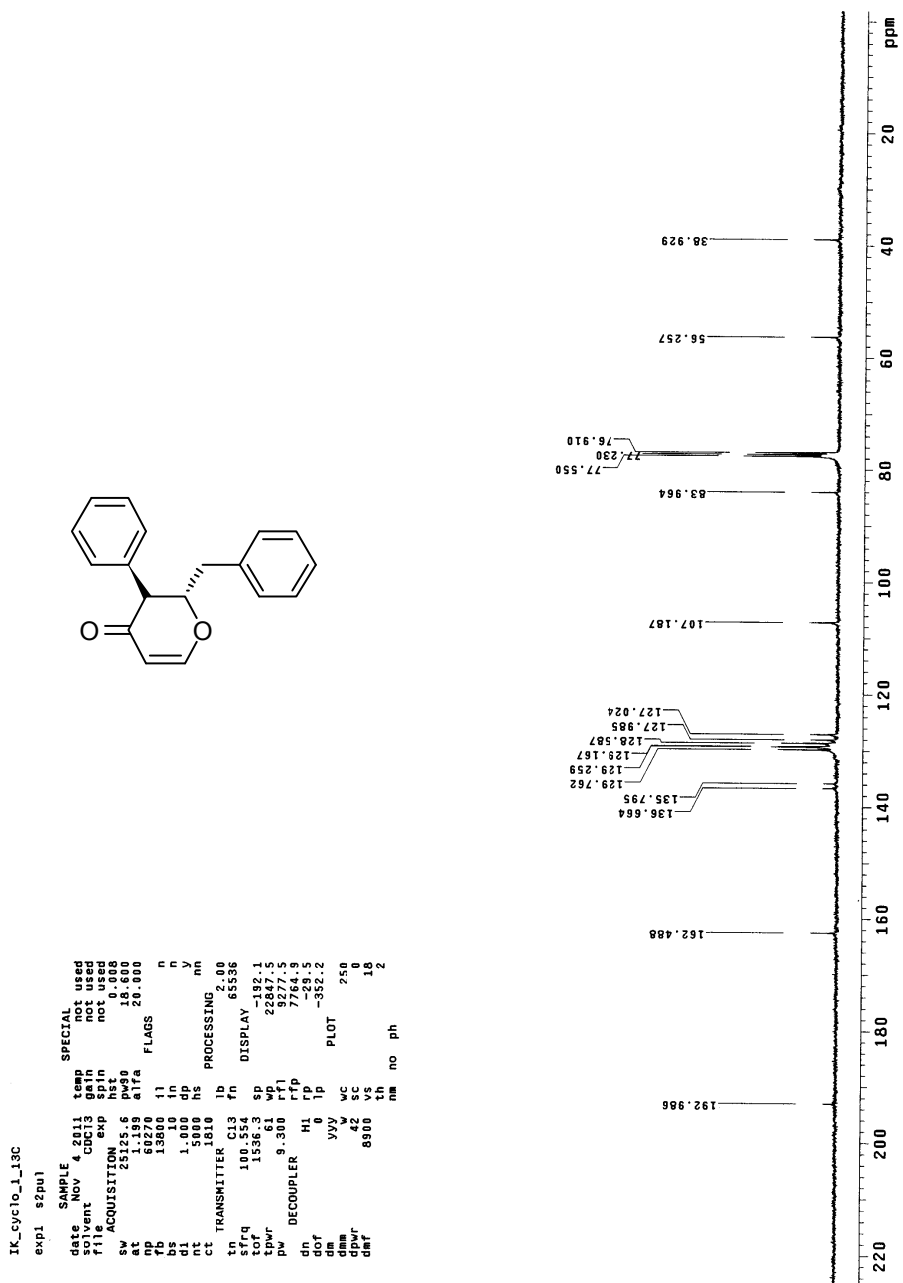



<sup>13</sup>C NMR spectrum of 2

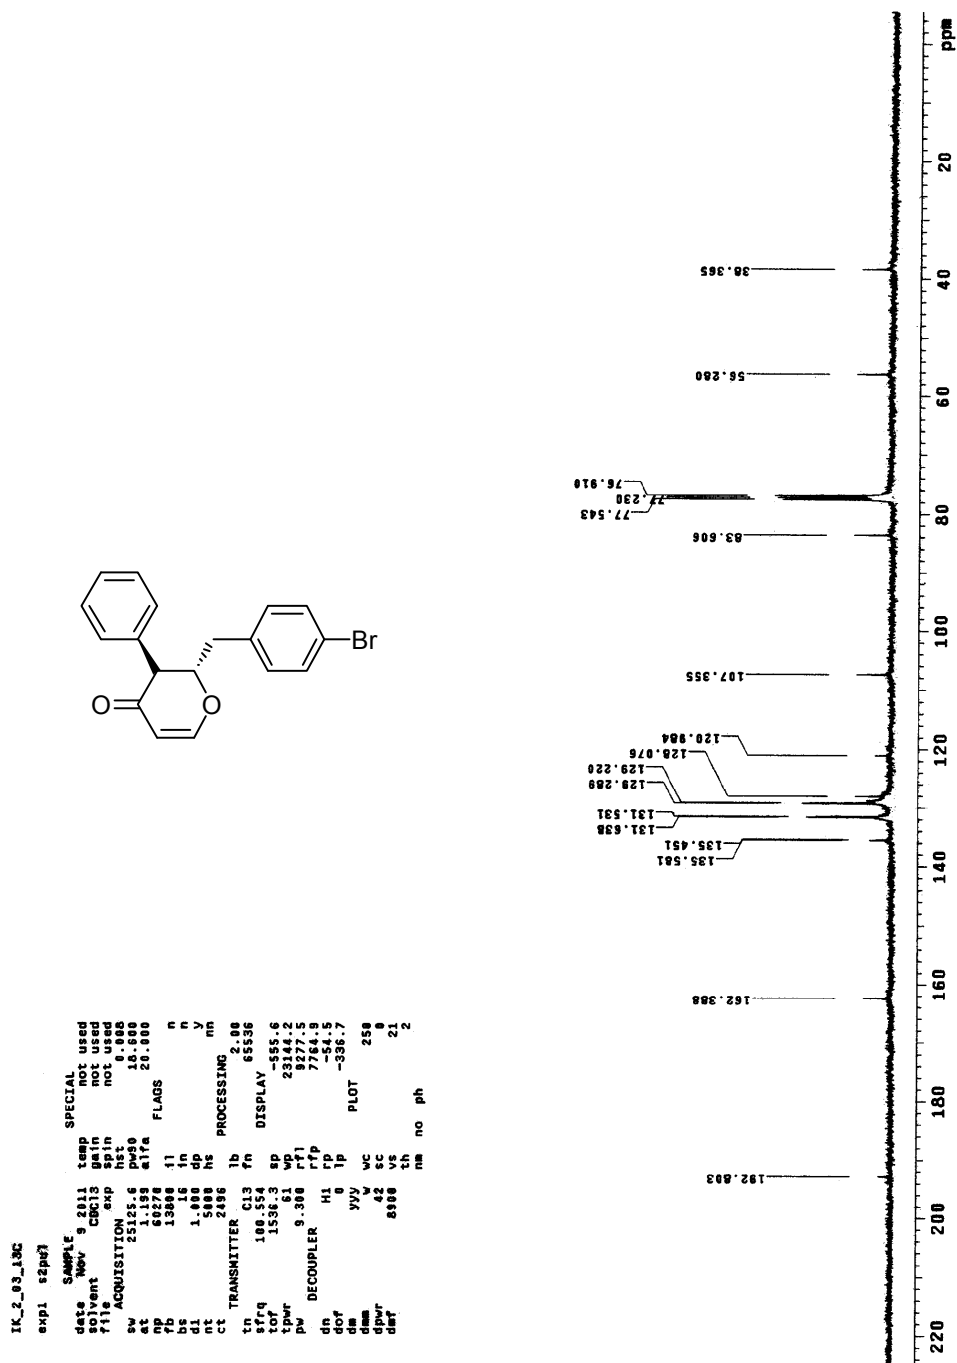

<sup>1</sup>H NMR spectrum of 3

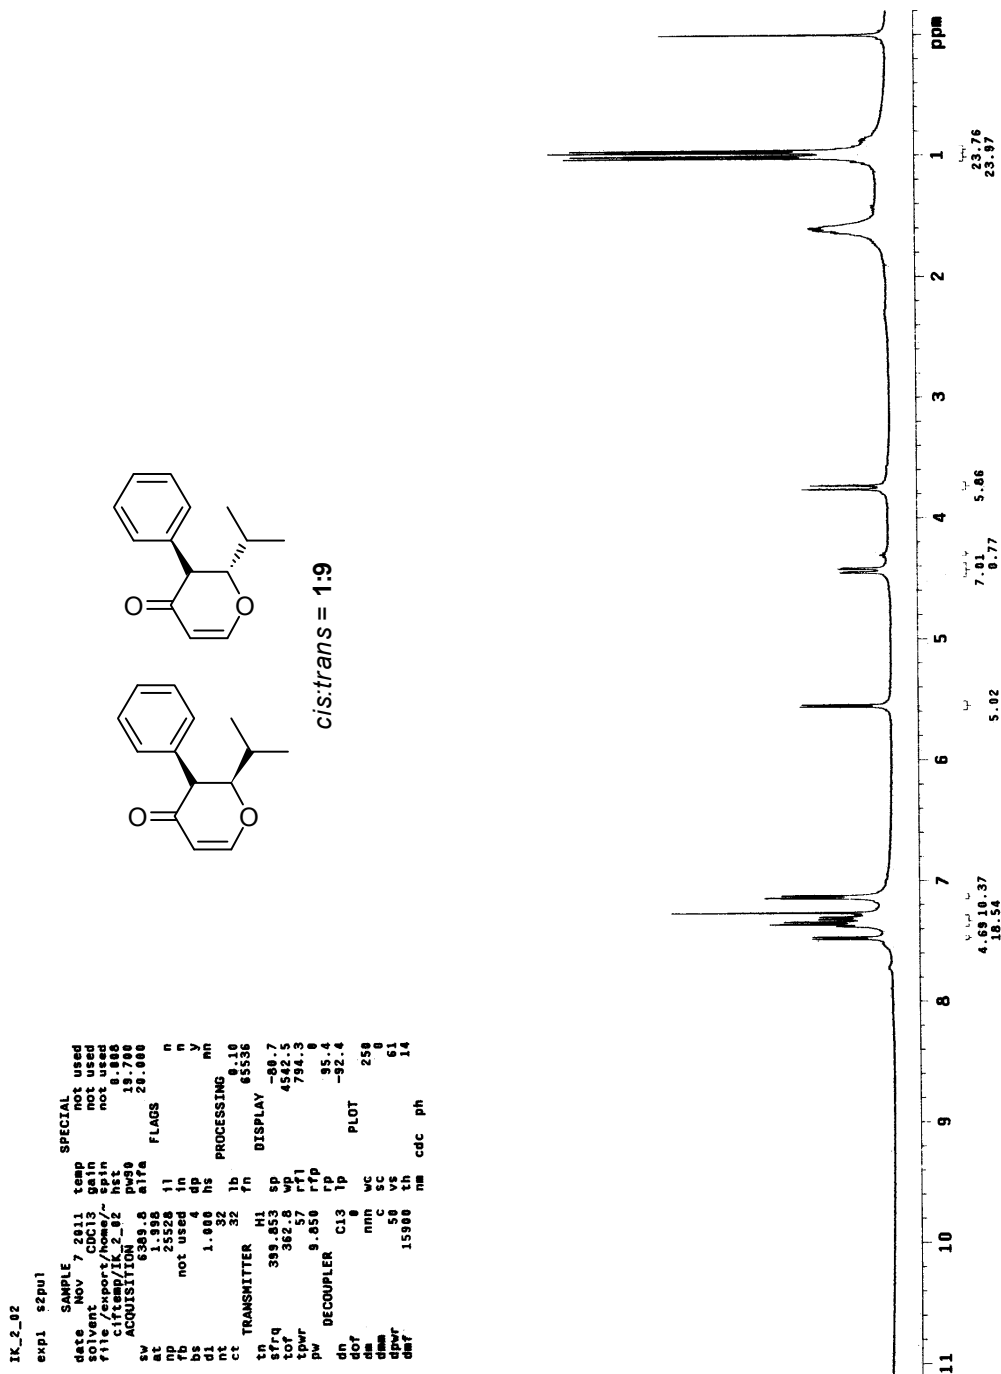





<sup>1</sup>H NMR spectrum of 4

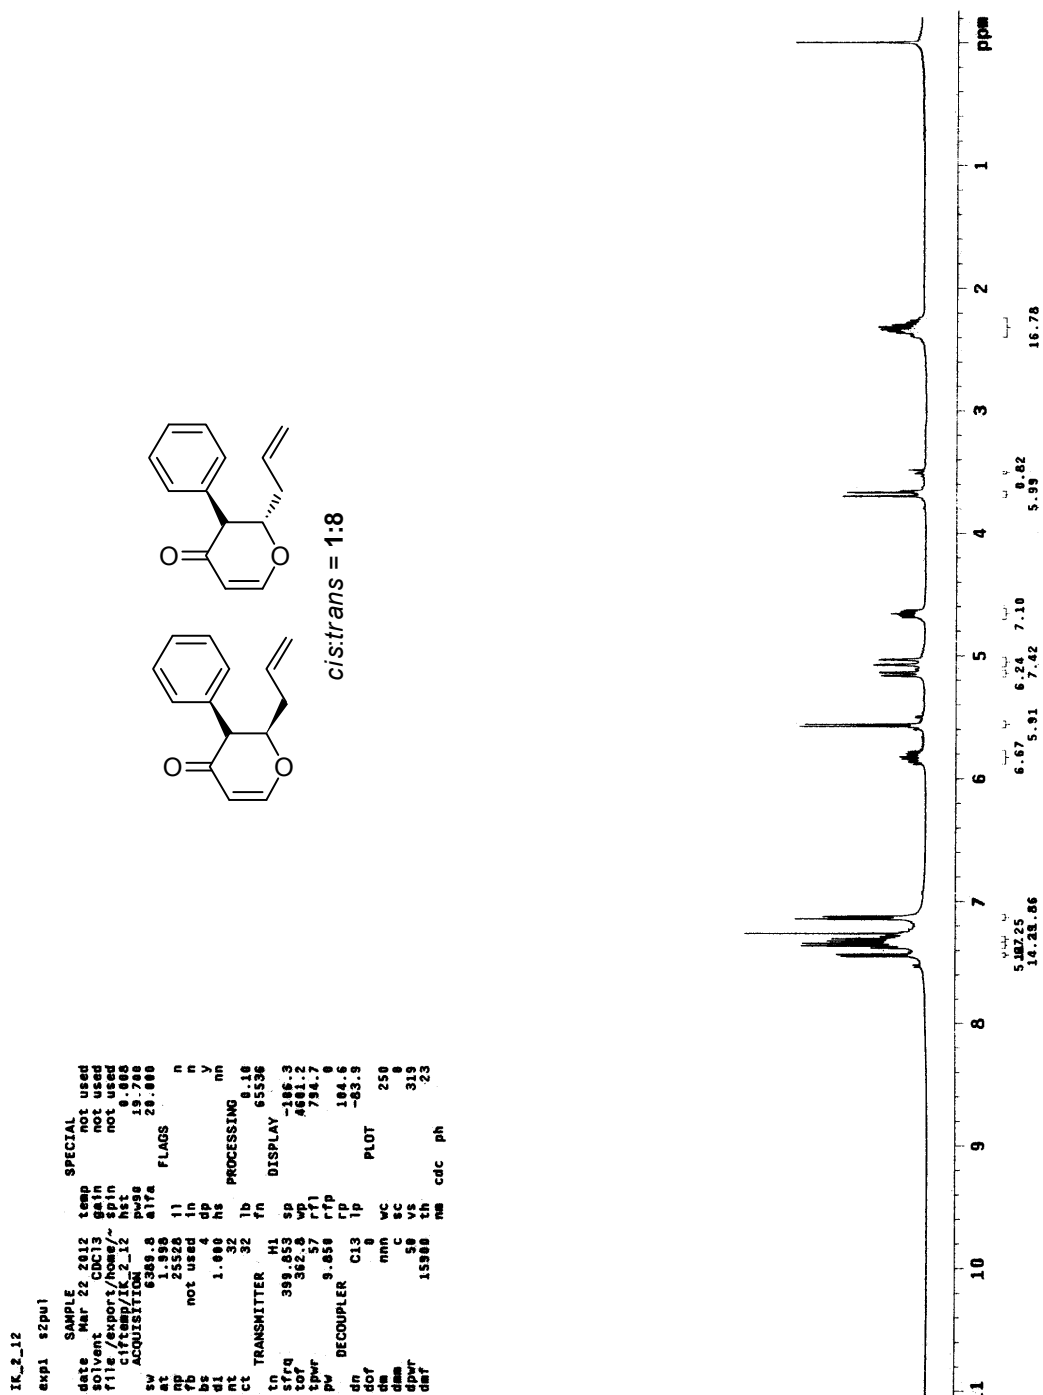

<sup>13</sup>C NMR spectrum of 4

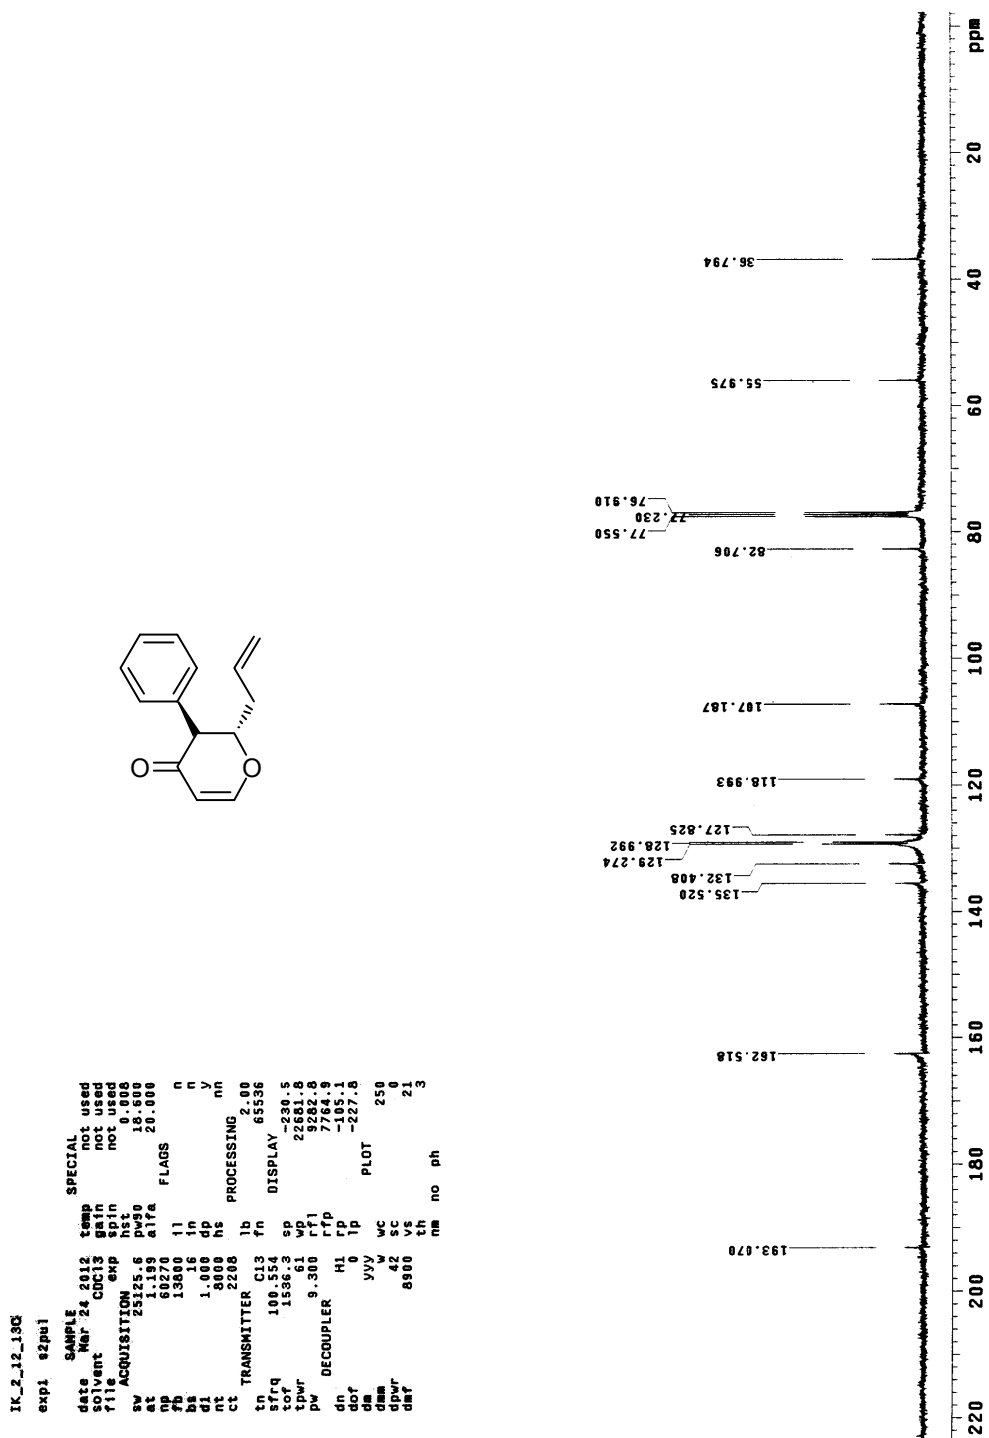

# <sup>1</sup>H NMR spectrum of 5

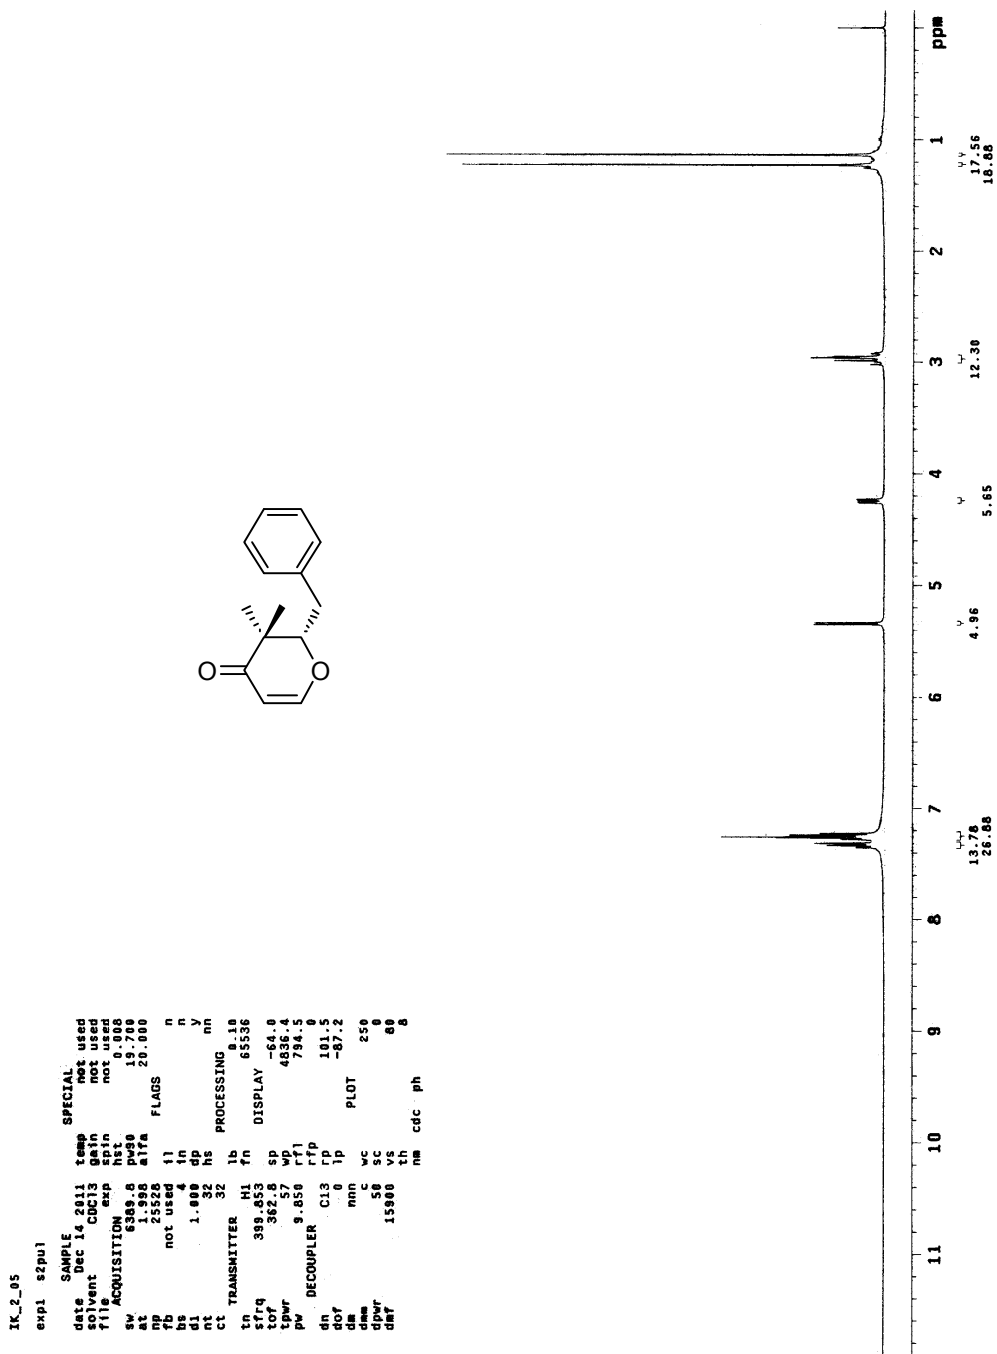

<sup>13</sup>C NMR spectrum of 5

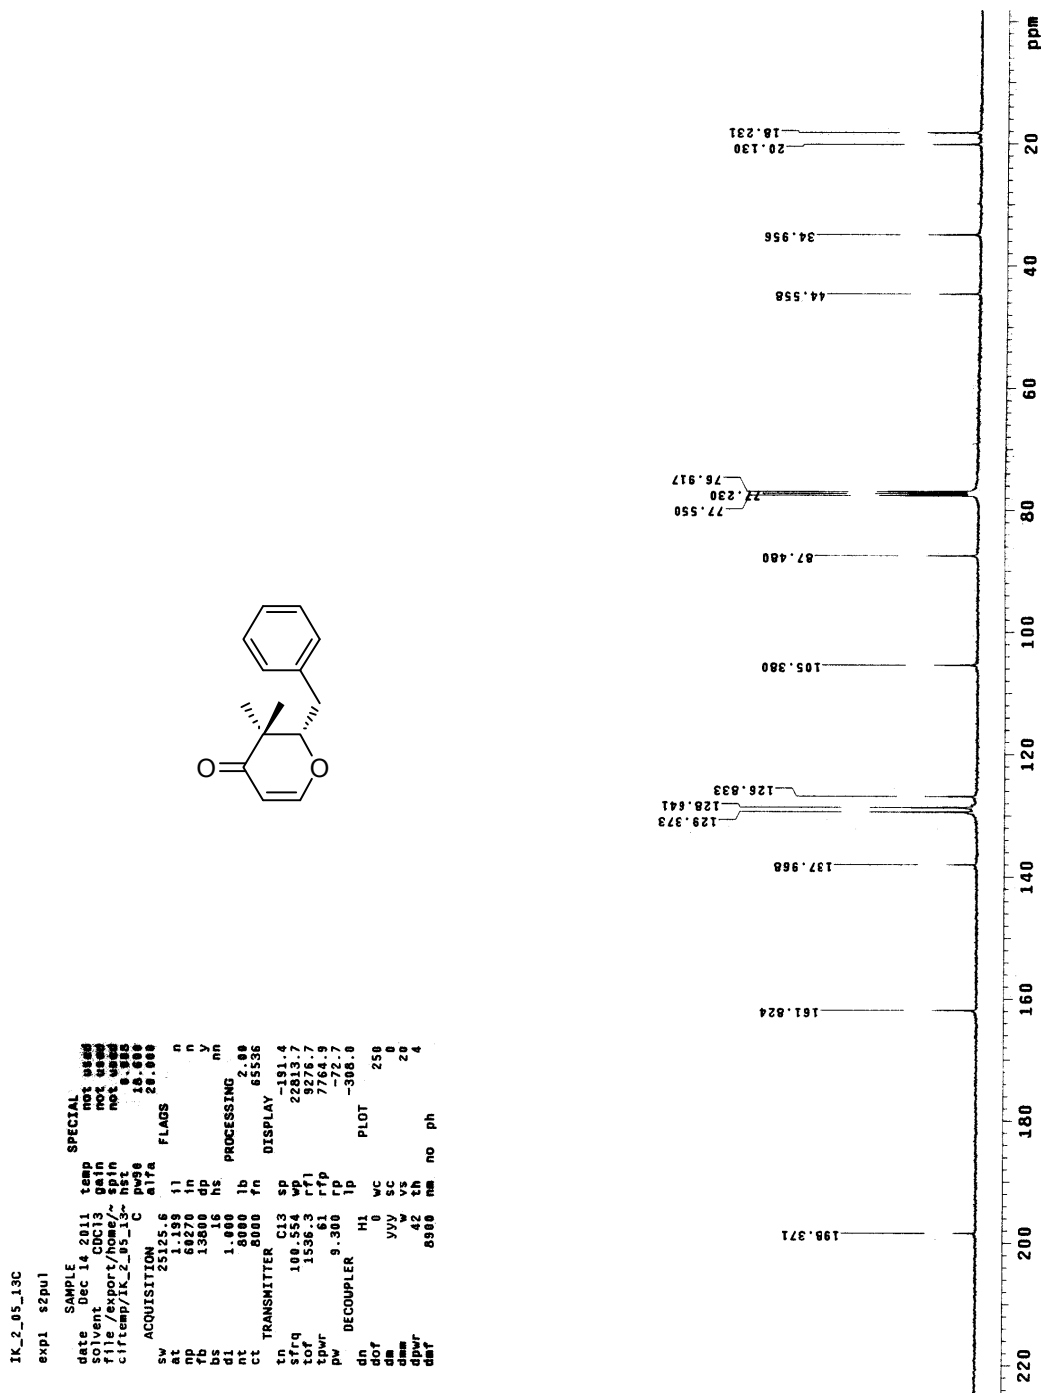

# <sup>1</sup>H NMR spectrum of 6

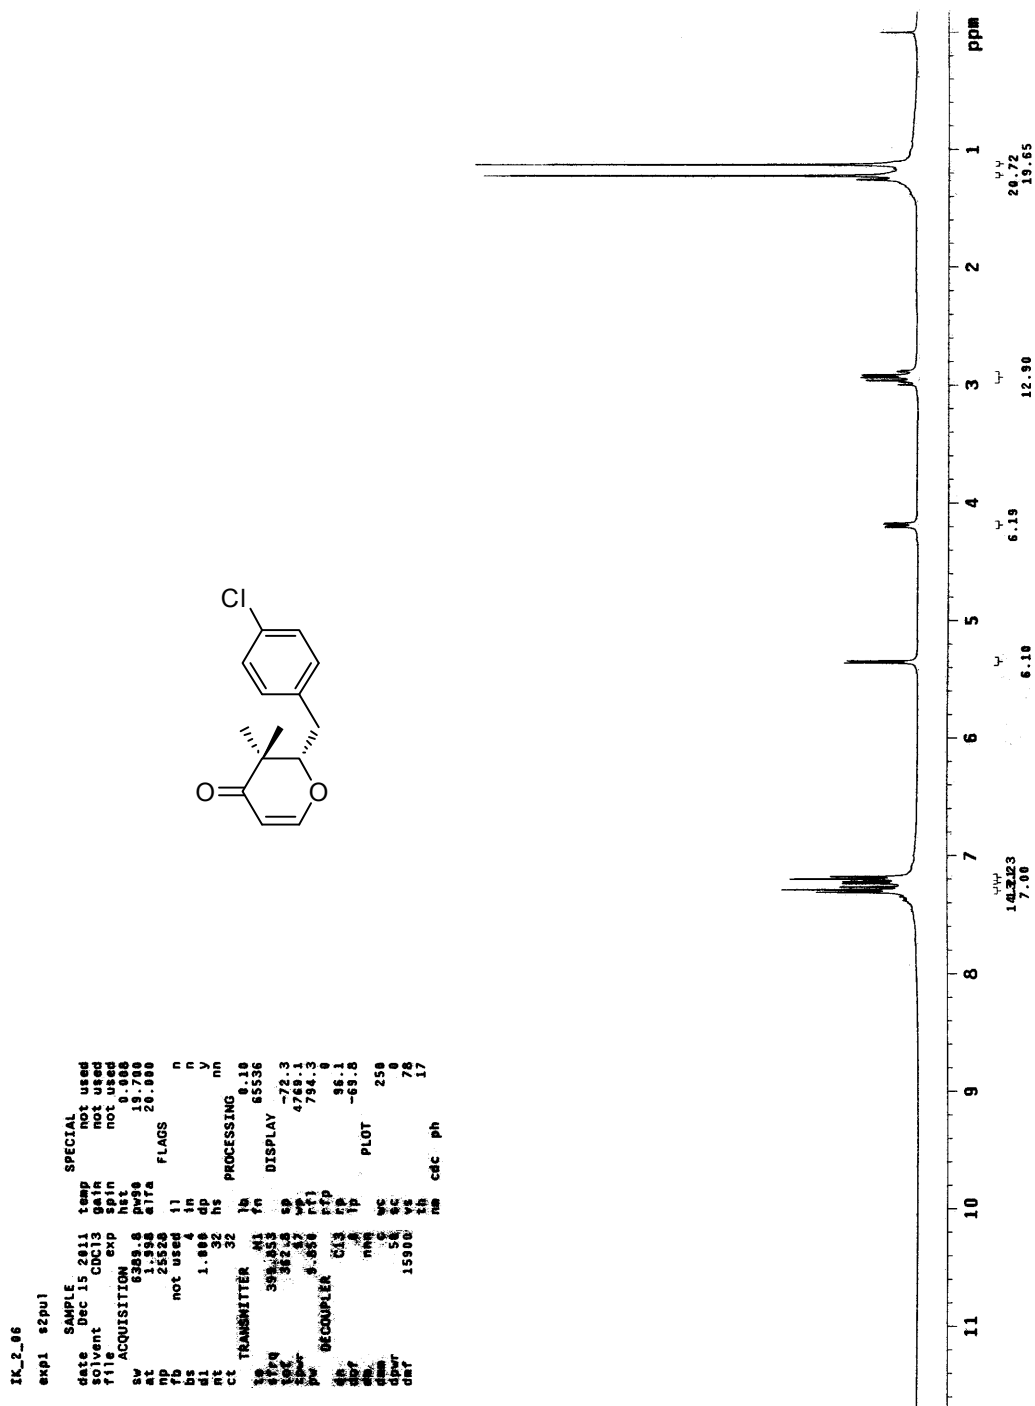

<sup>13</sup>C NMR spectrum of 6

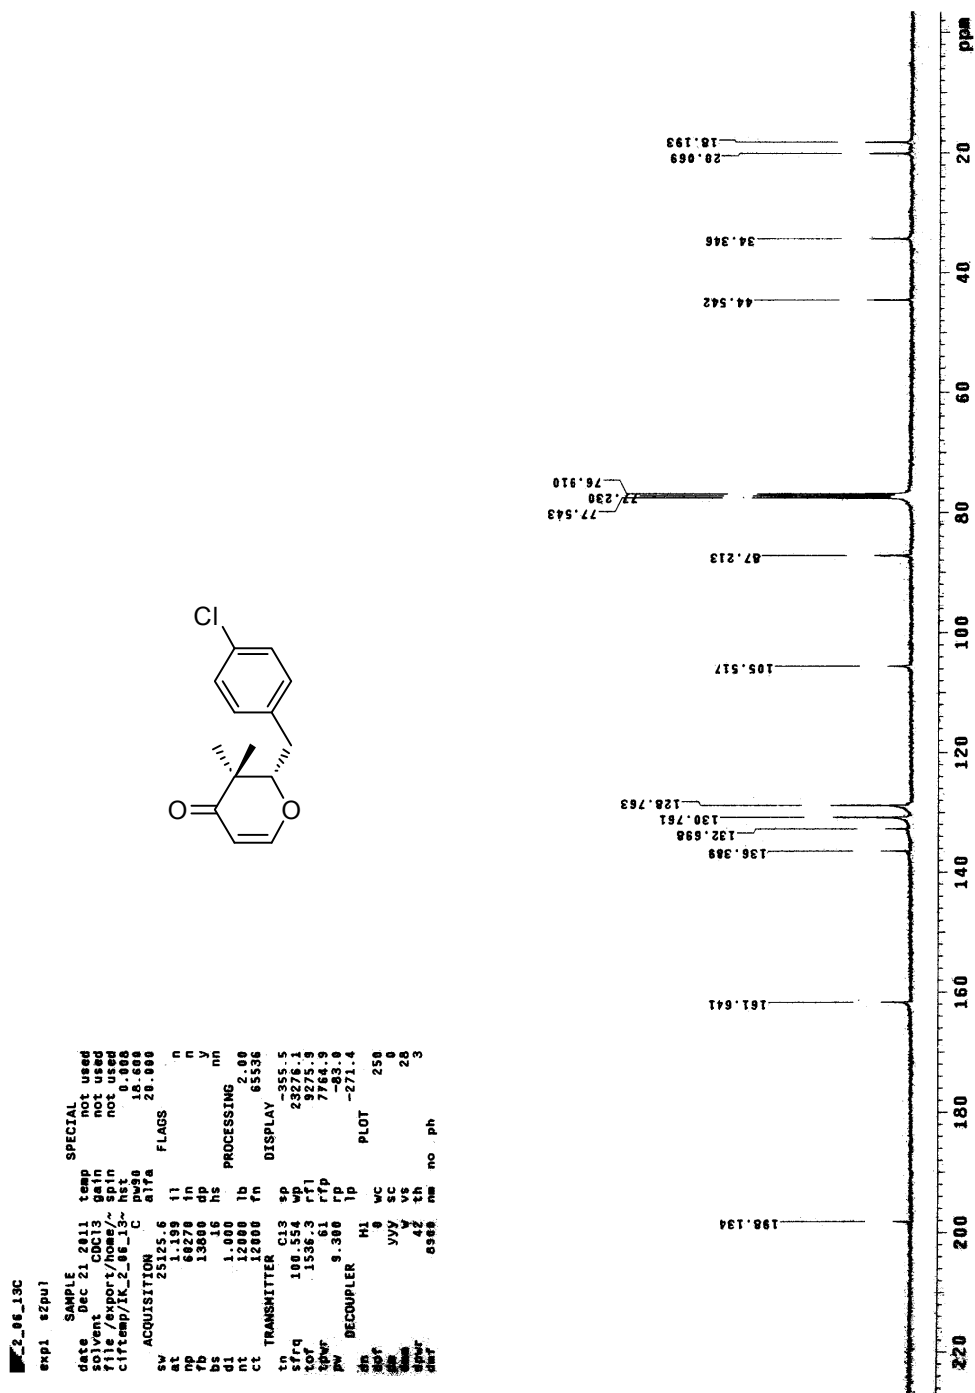

# <sup>1</sup>H NMR spectrum of 7

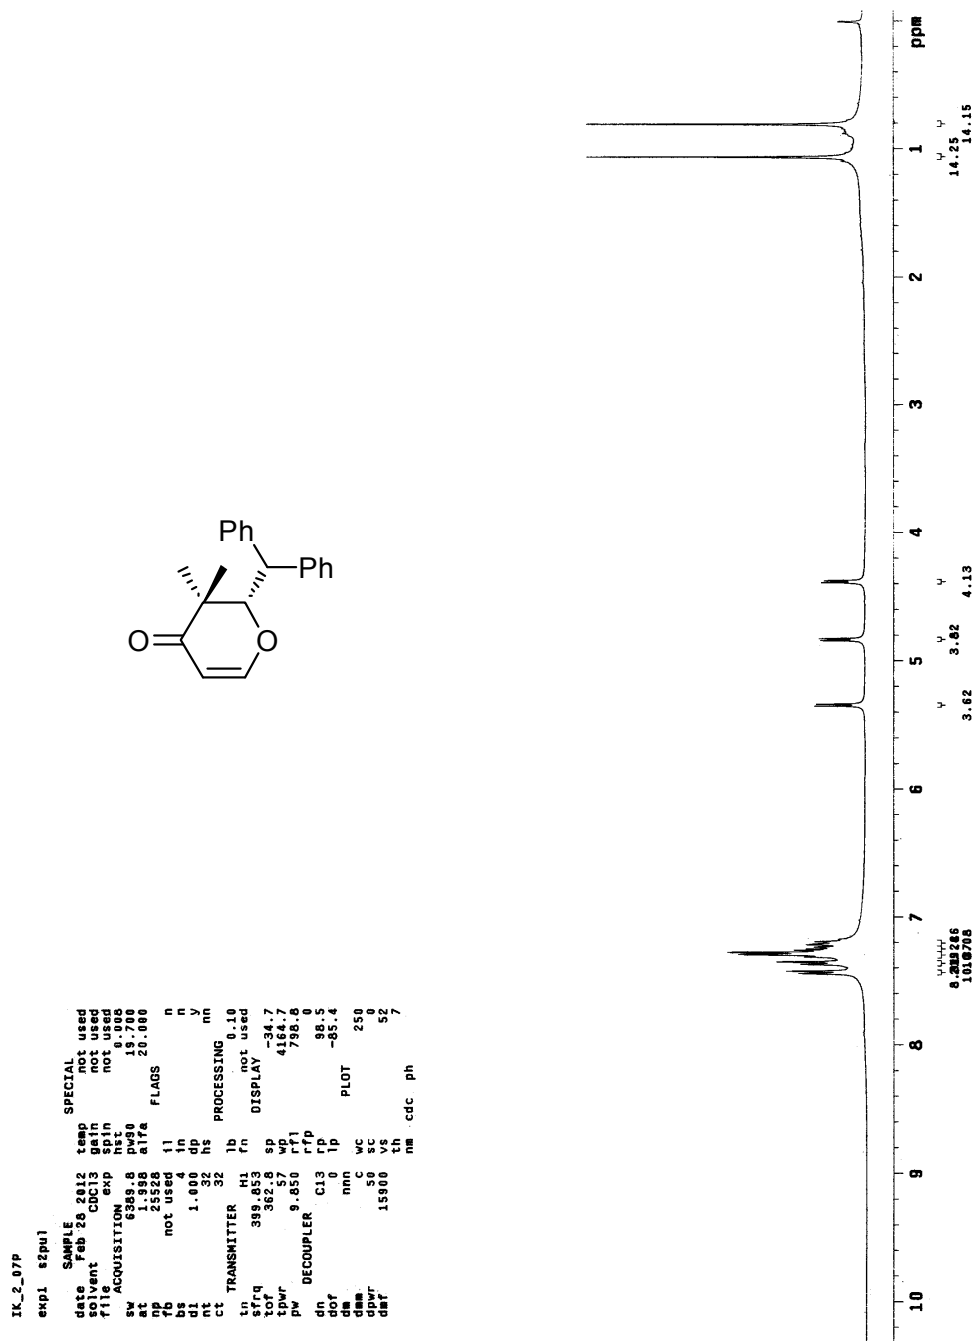

<sup>13</sup>C NMR spectrum of 7

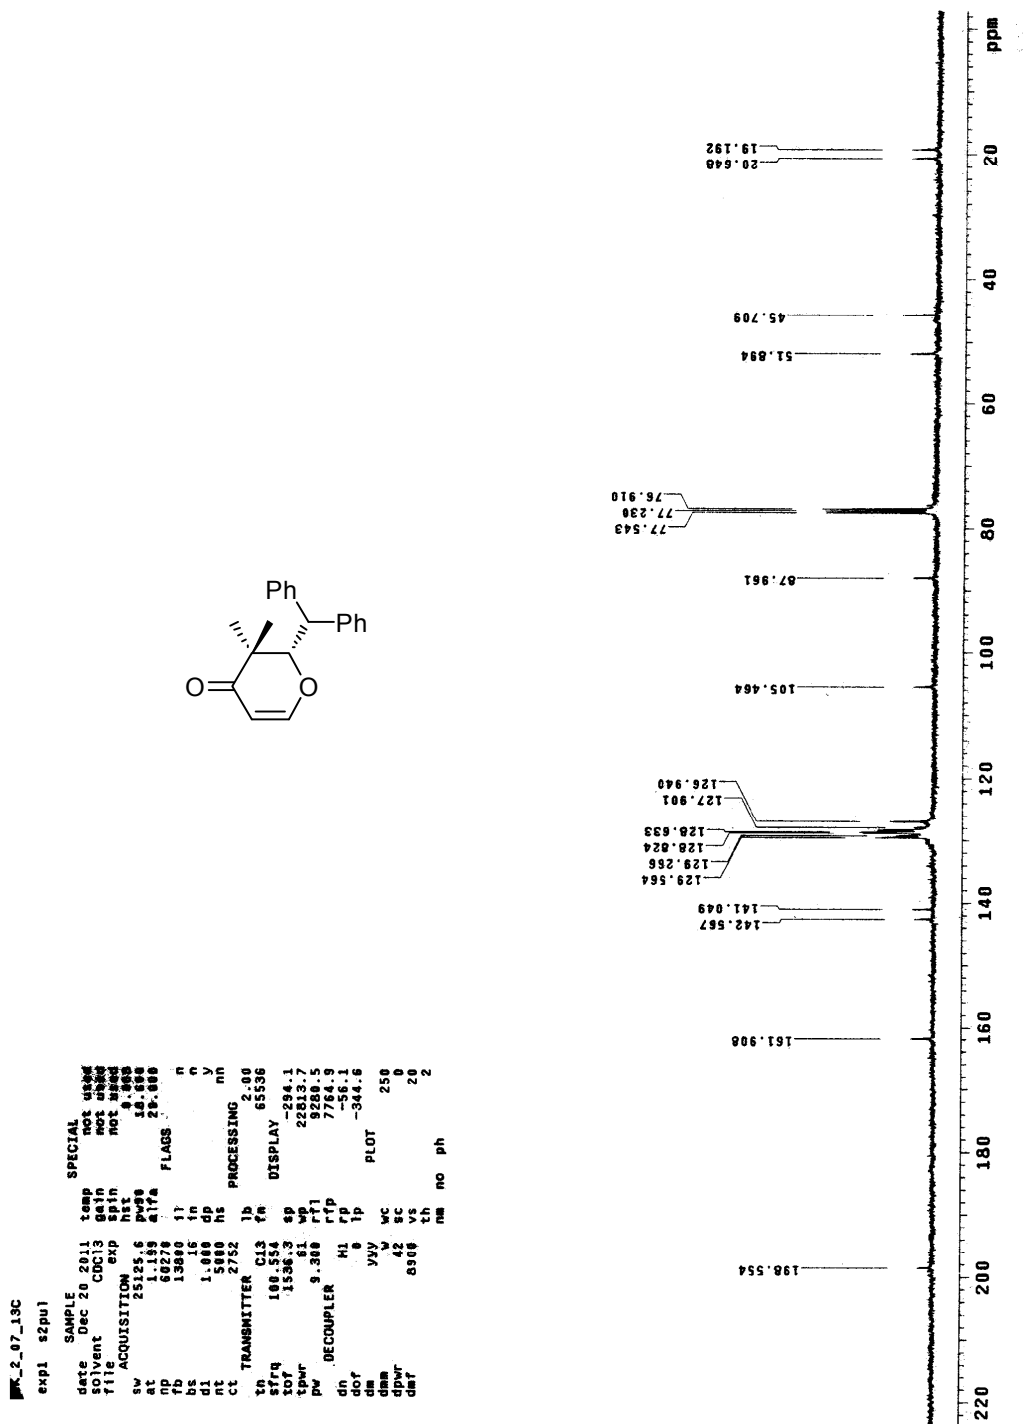



# <sup>1</sup>H NMR spectrum of 8

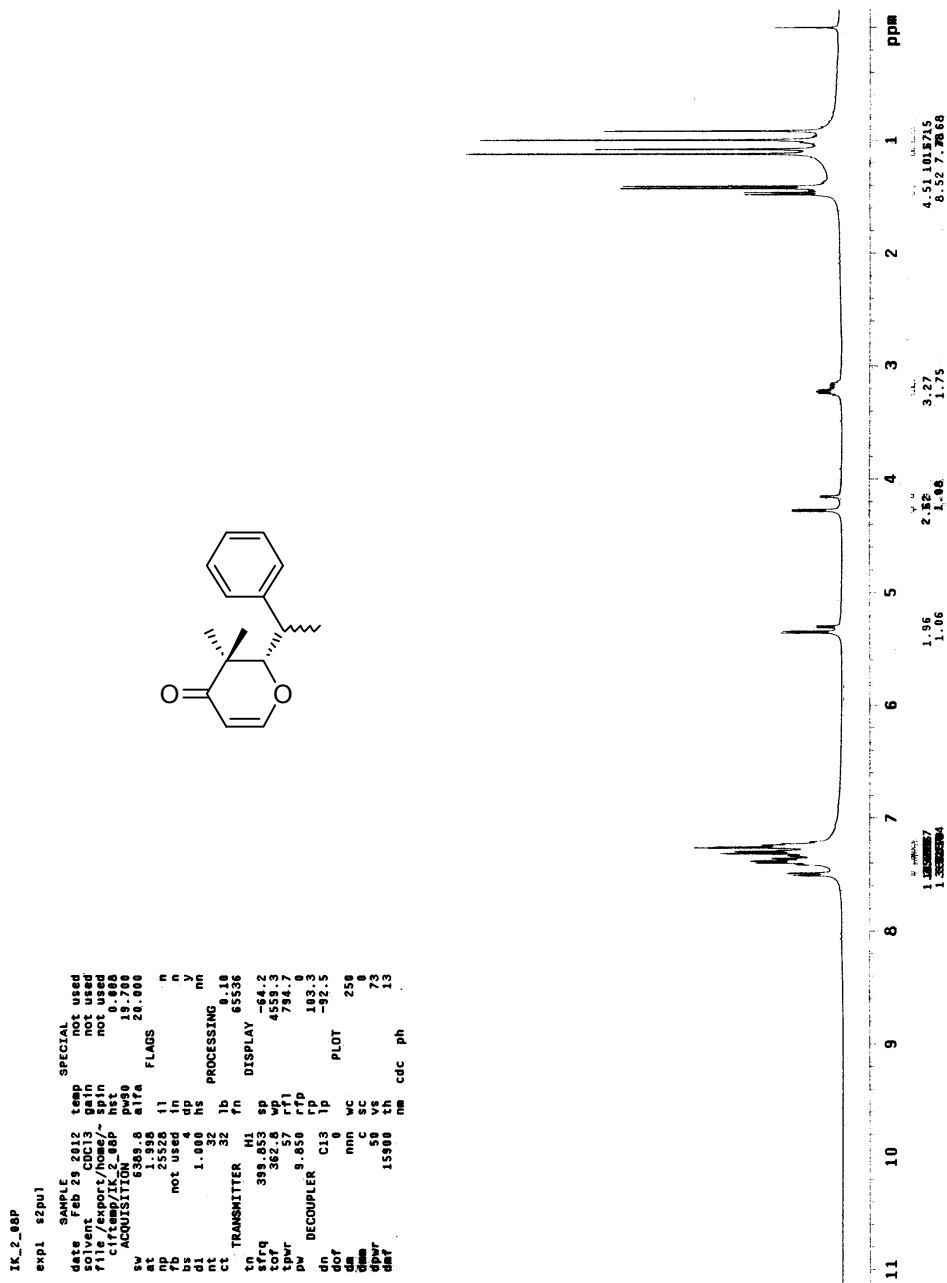

### <sup>13</sup>C NMR spectrum of 8

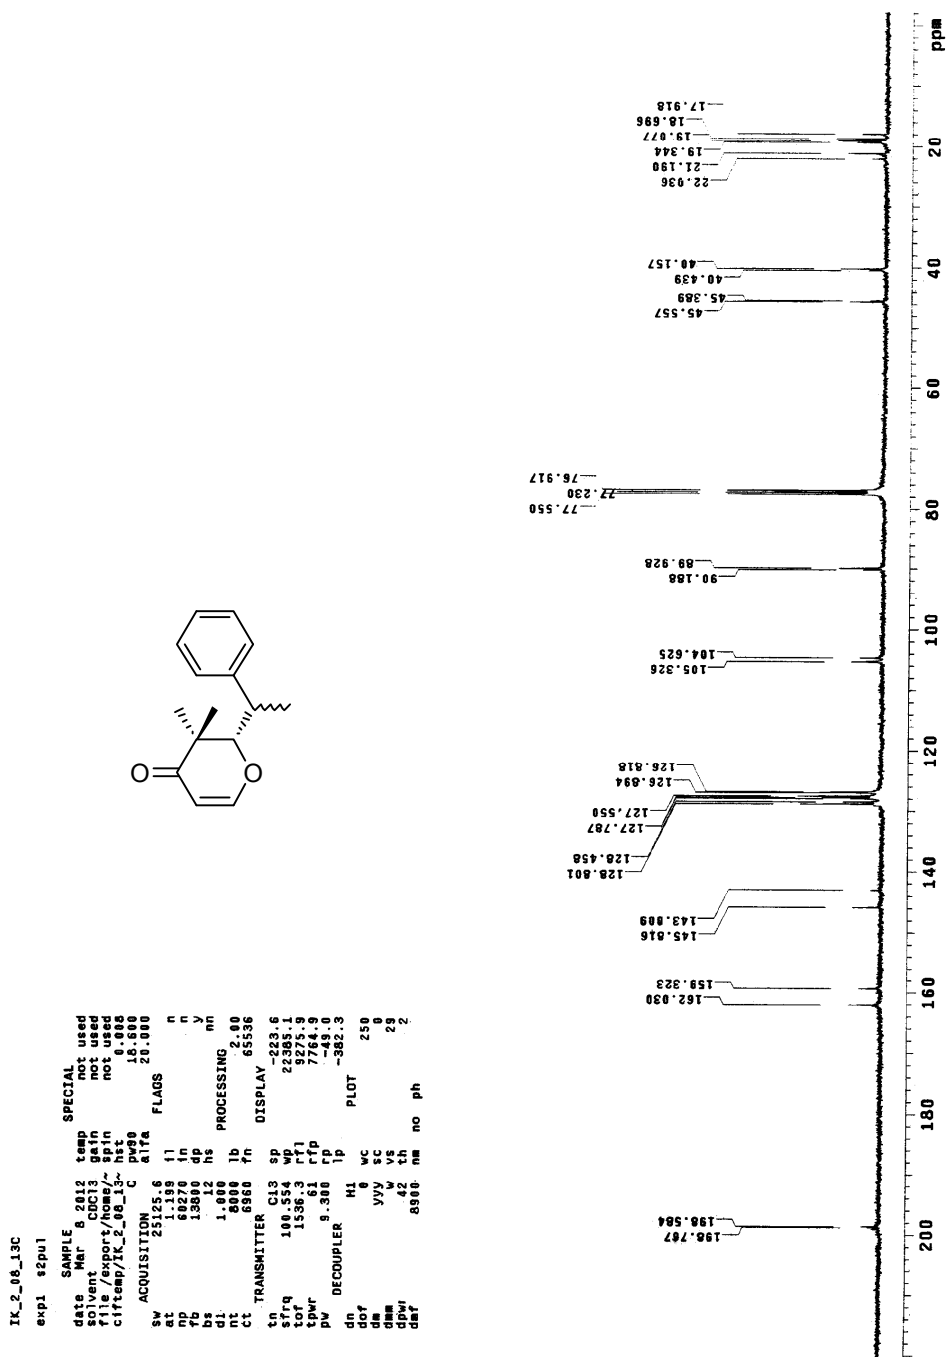

<sup>1</sup>H NMR spectrum of **9**

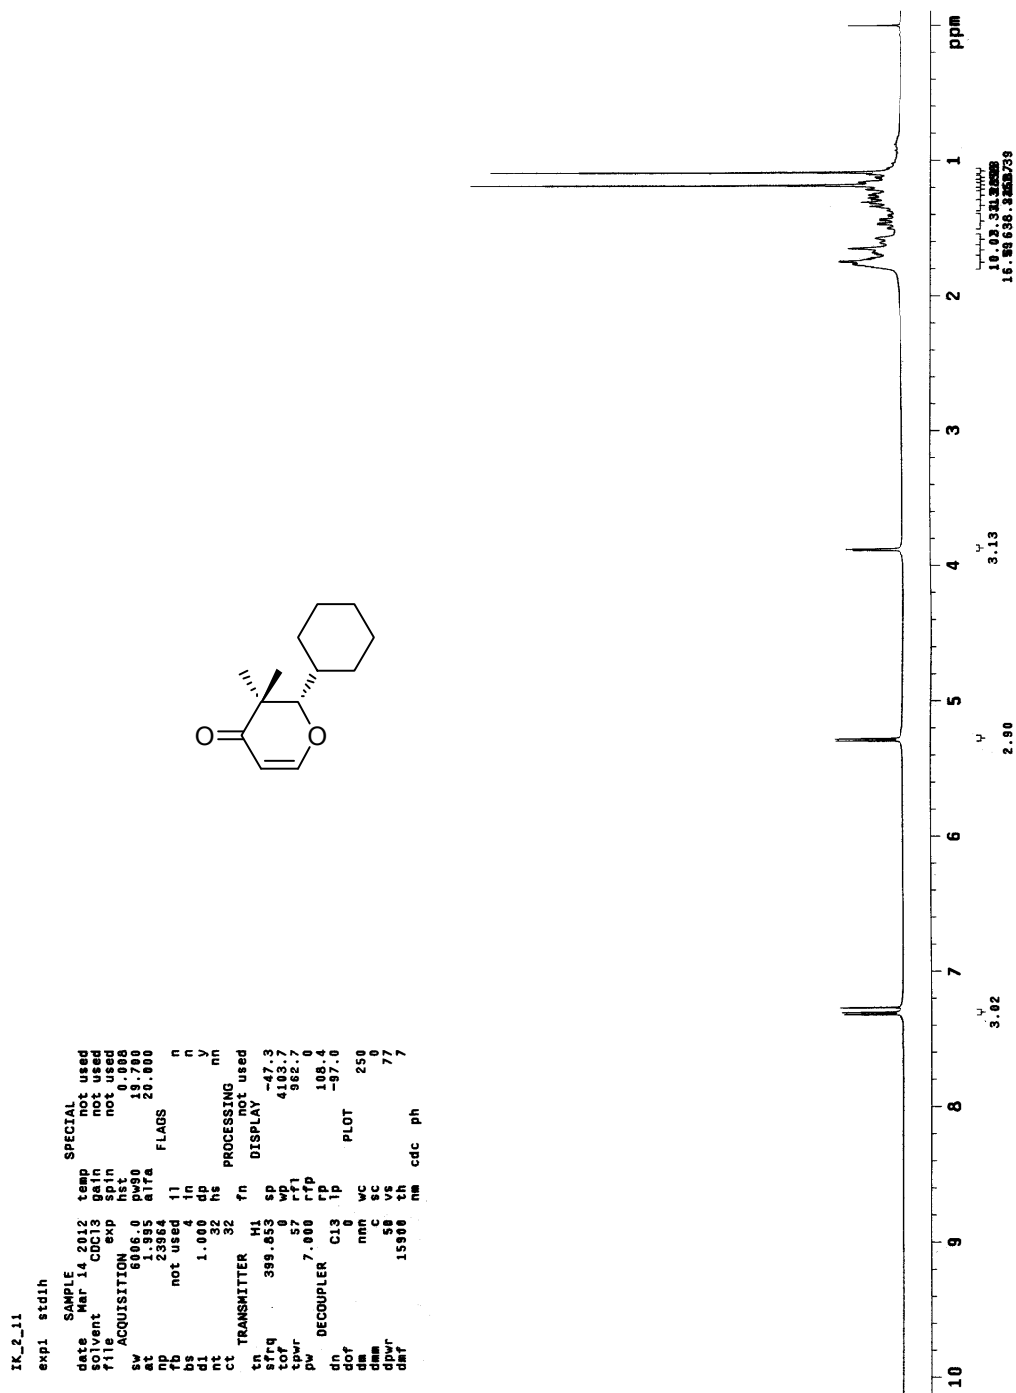

<sup>13</sup>C NMR spectrum of 9

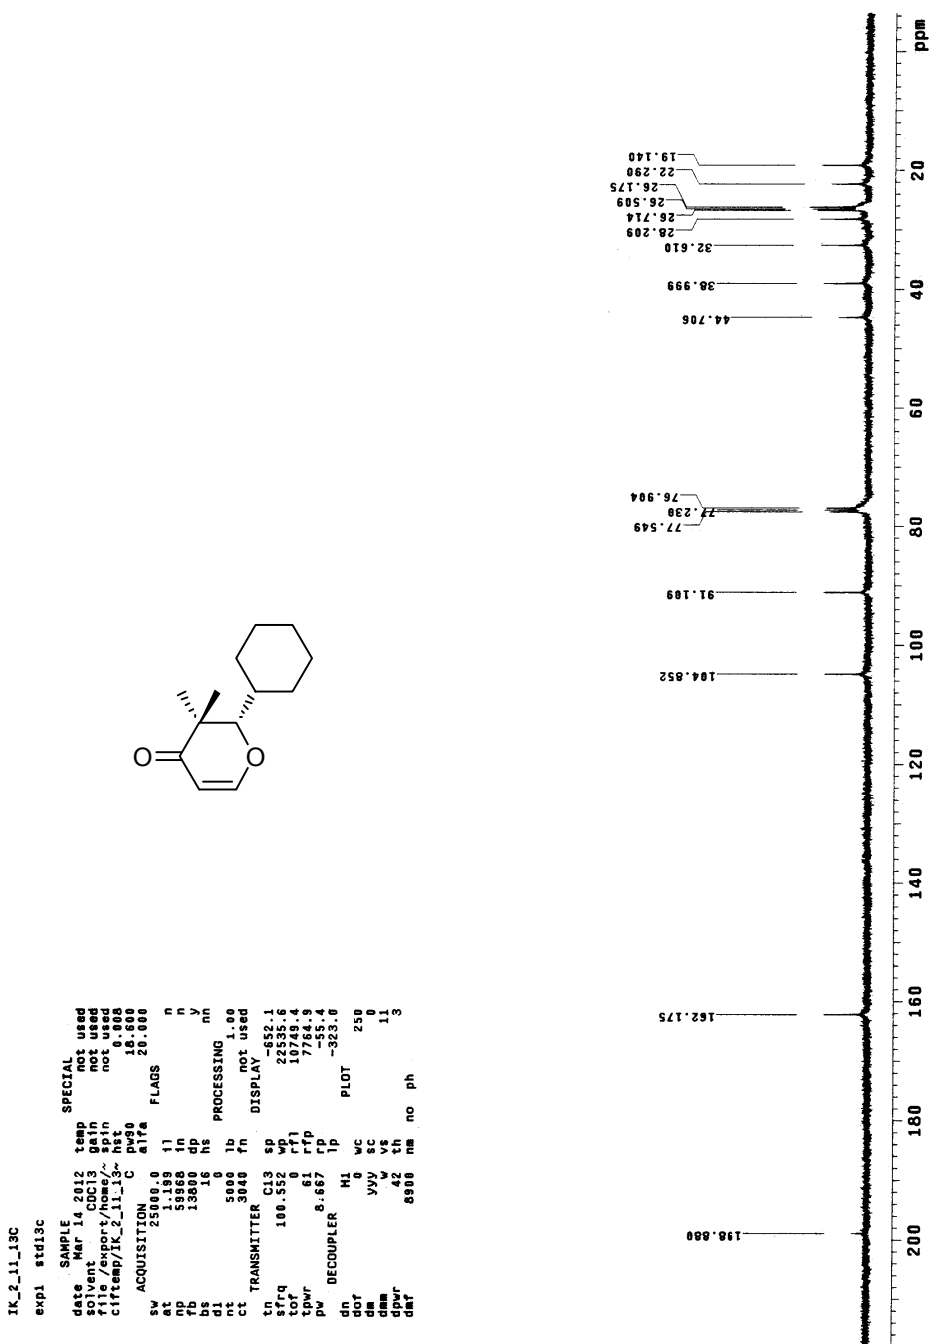

<sup>1</sup>H NMR spectrum of 10

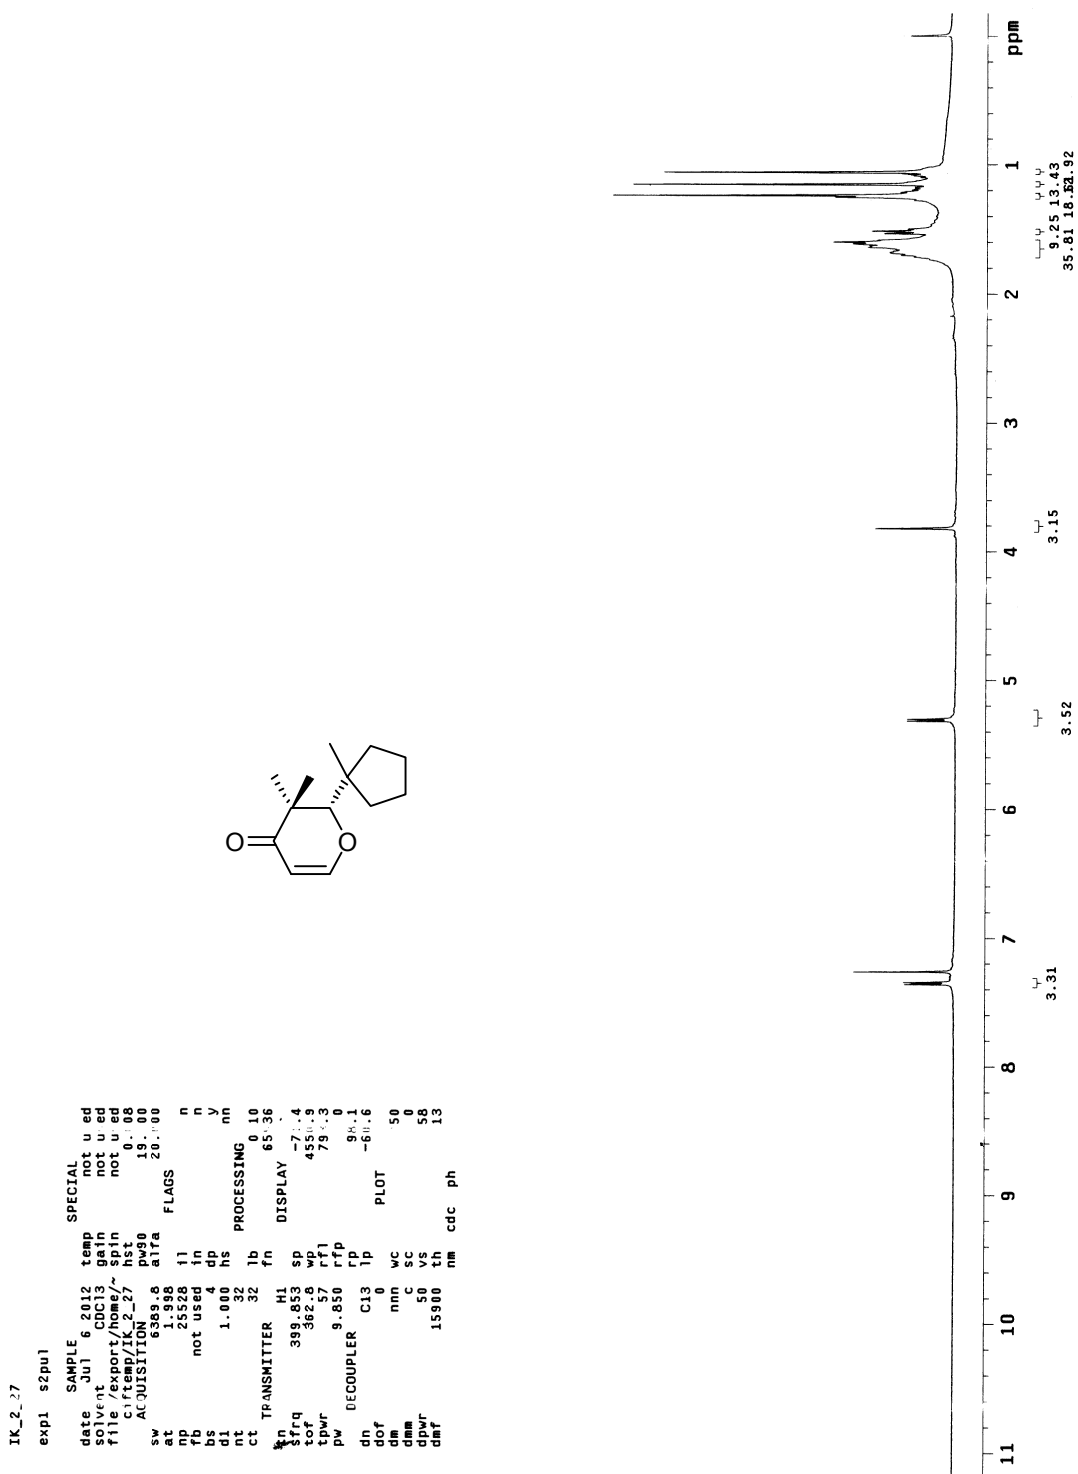

### <sup>13</sup>C NMR spectrum of 10

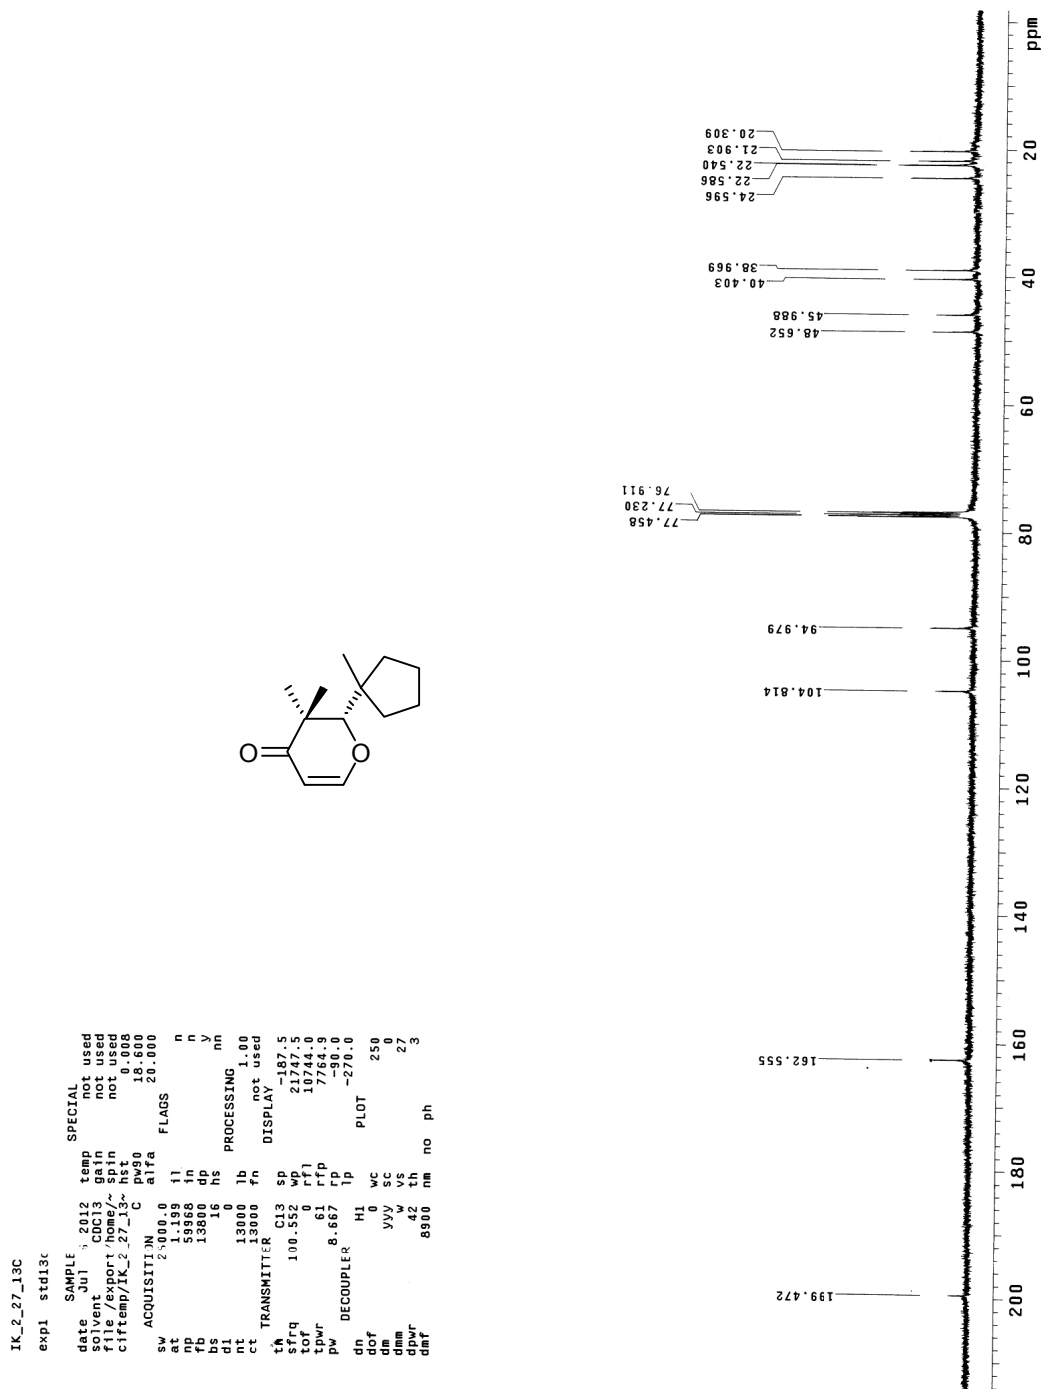

$^1\text{H}$  NMR spectrum of 13

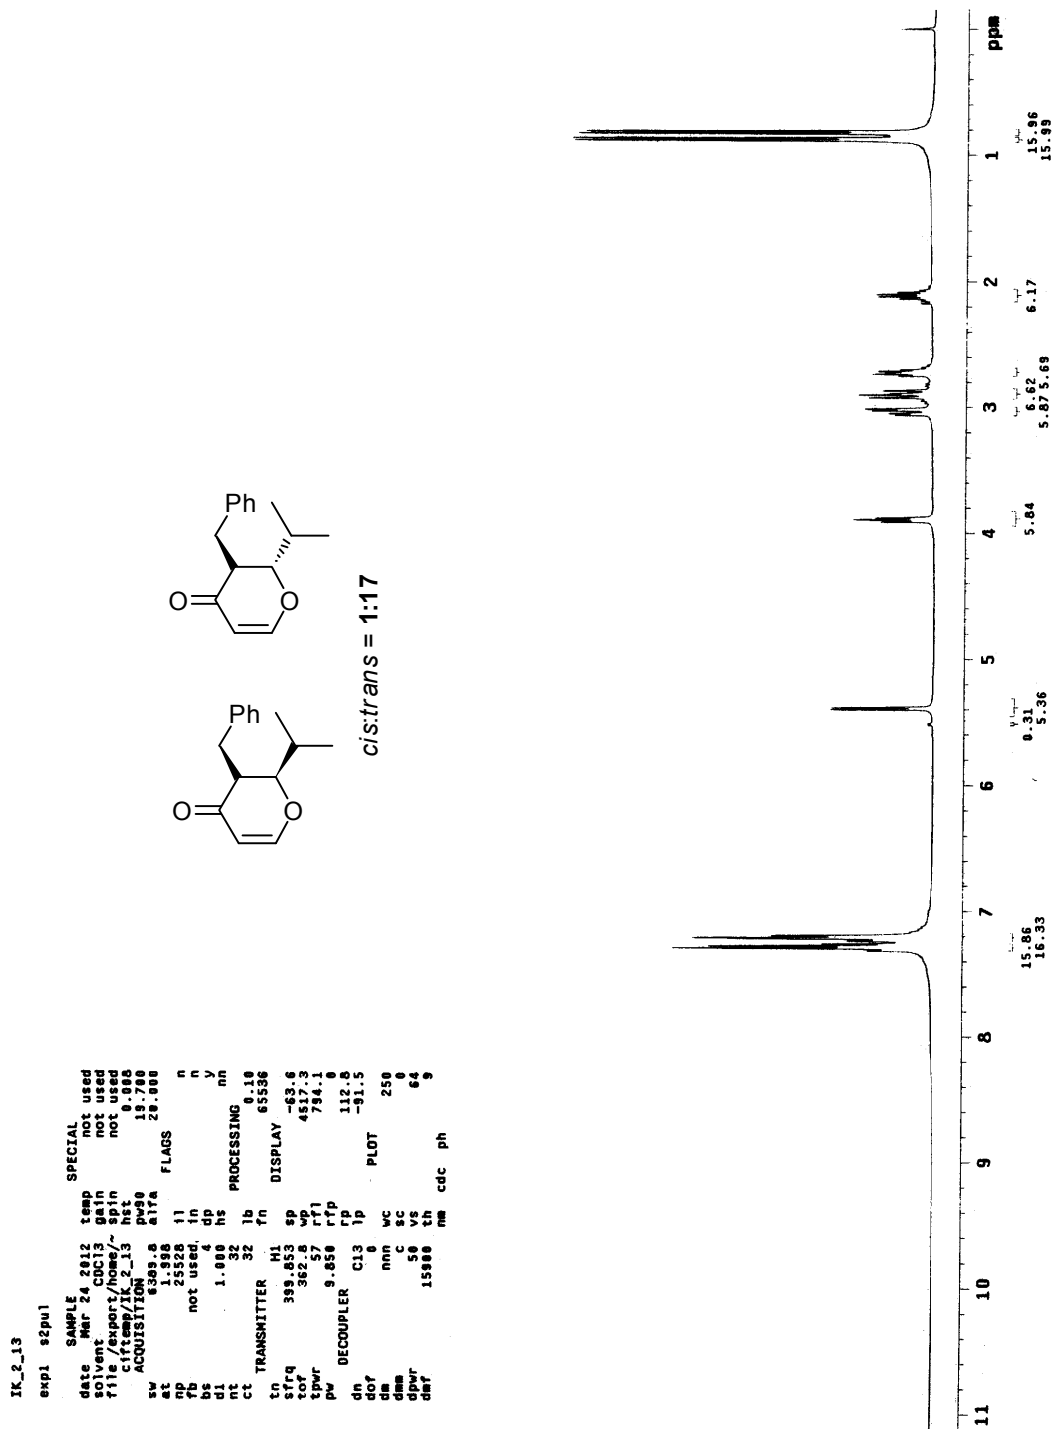

<sup>13</sup>C NMR spectrum of 13

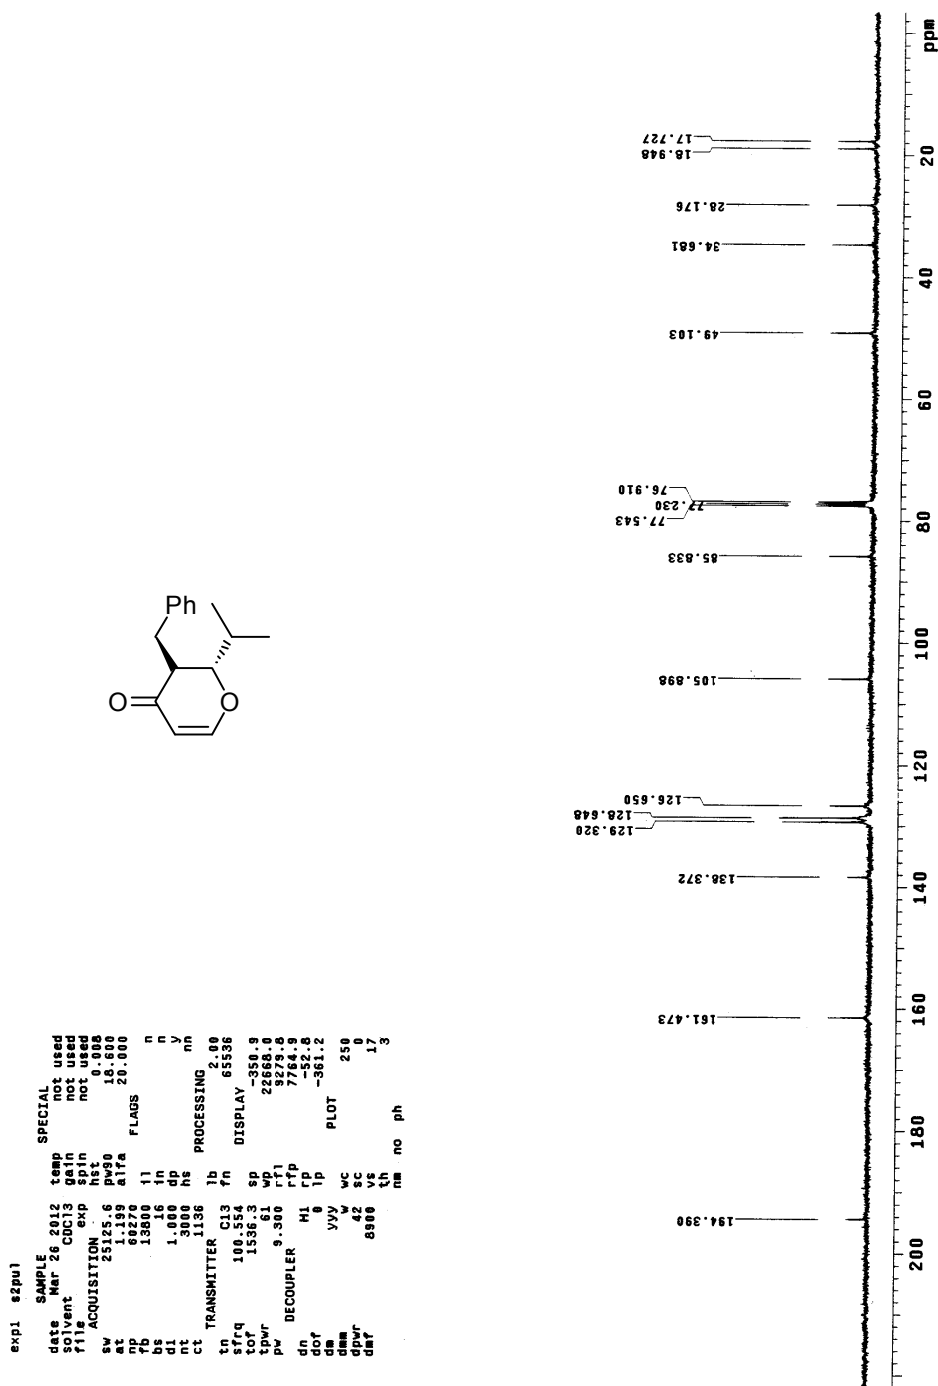





$^{13}\text{C}$  NMR spectrum of 14

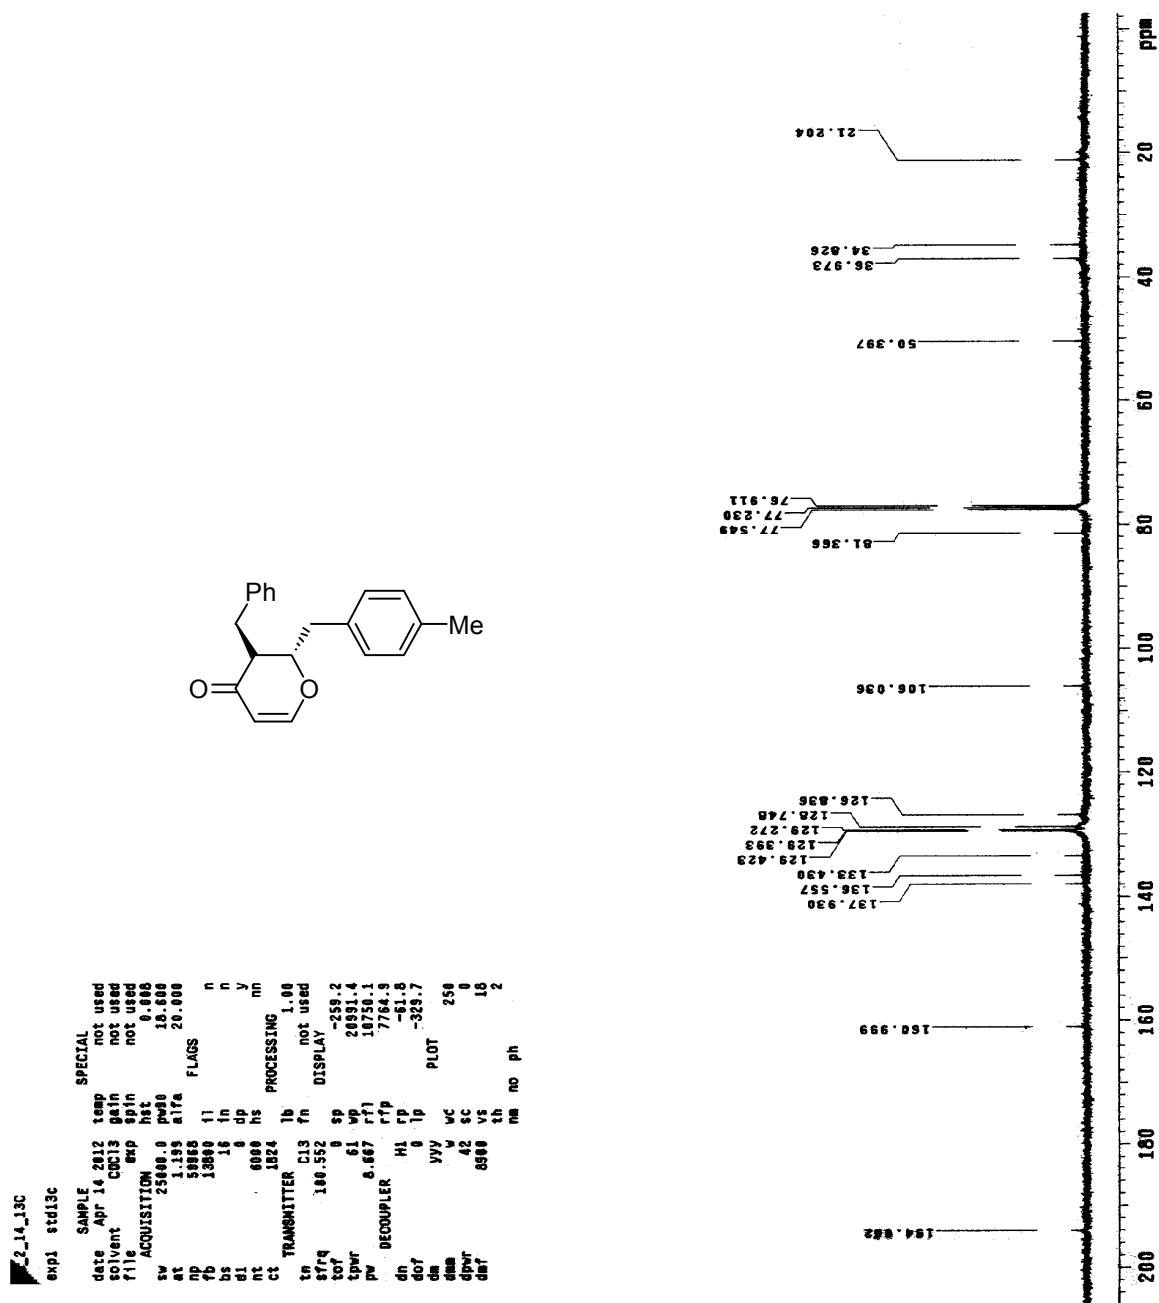



$^{13}\text{C}$  NMR spectrum of **15**

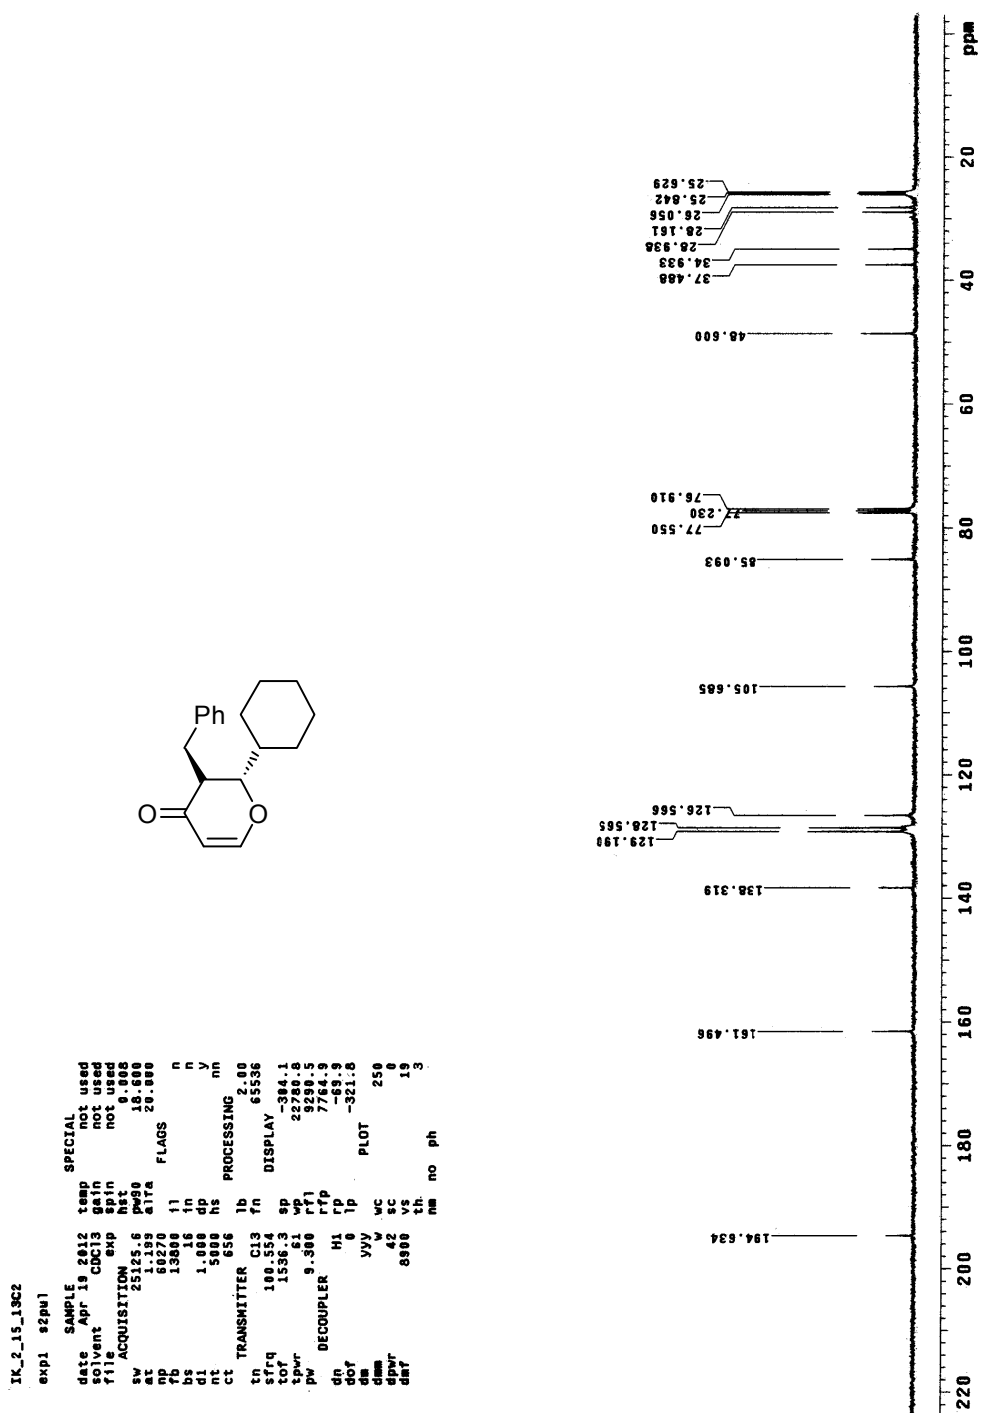

$^1\text{H}$  NMR spectrum of **16**

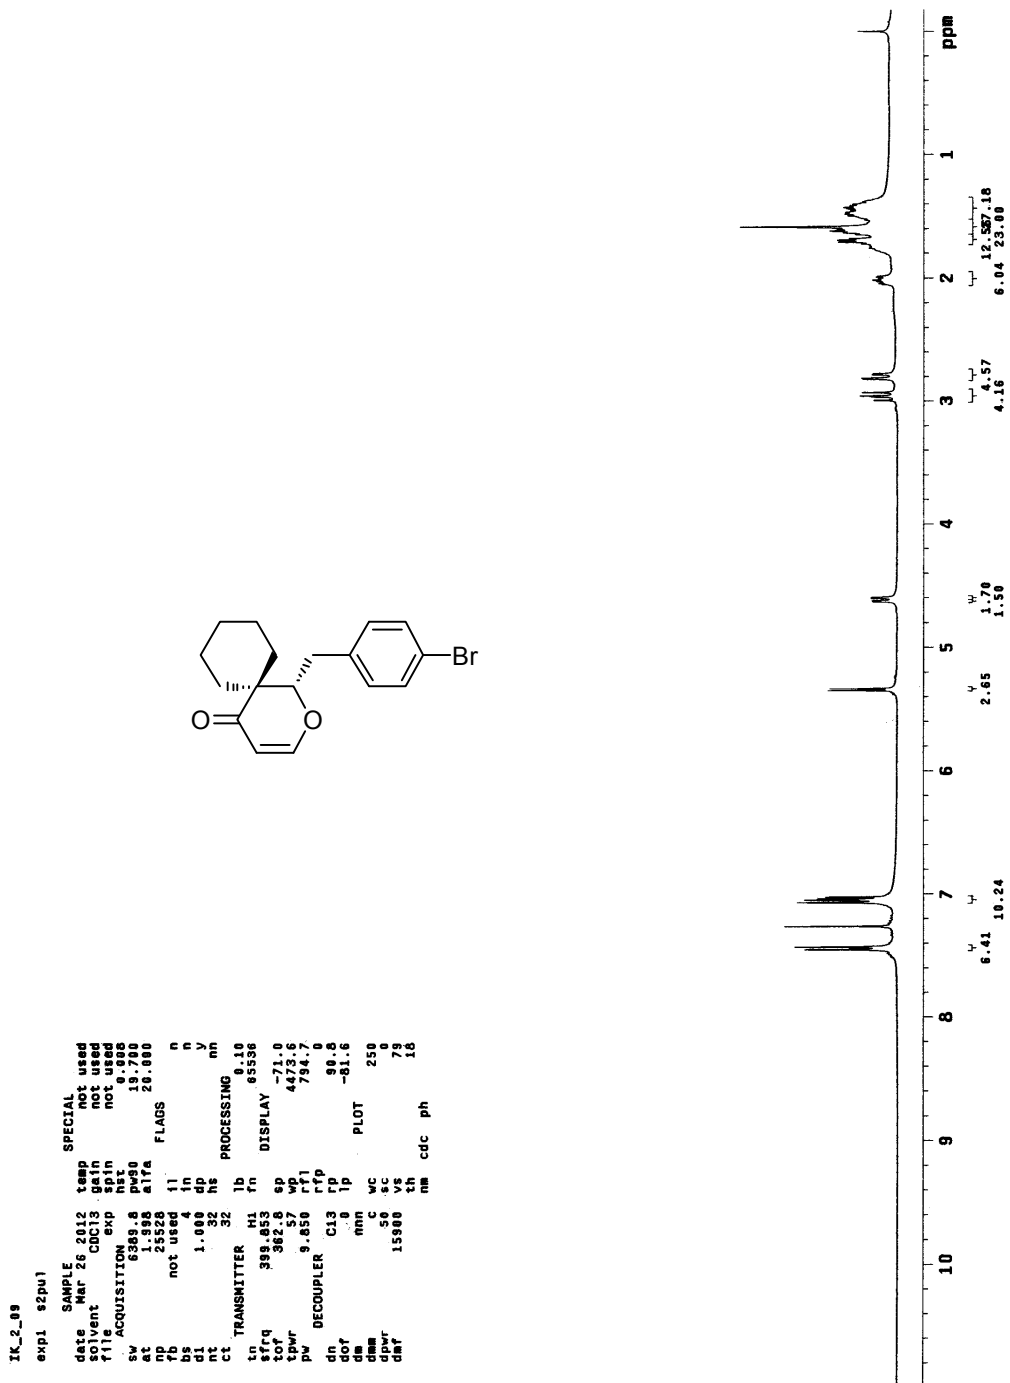



$^1\text{H}$  NMR spectrum of 17

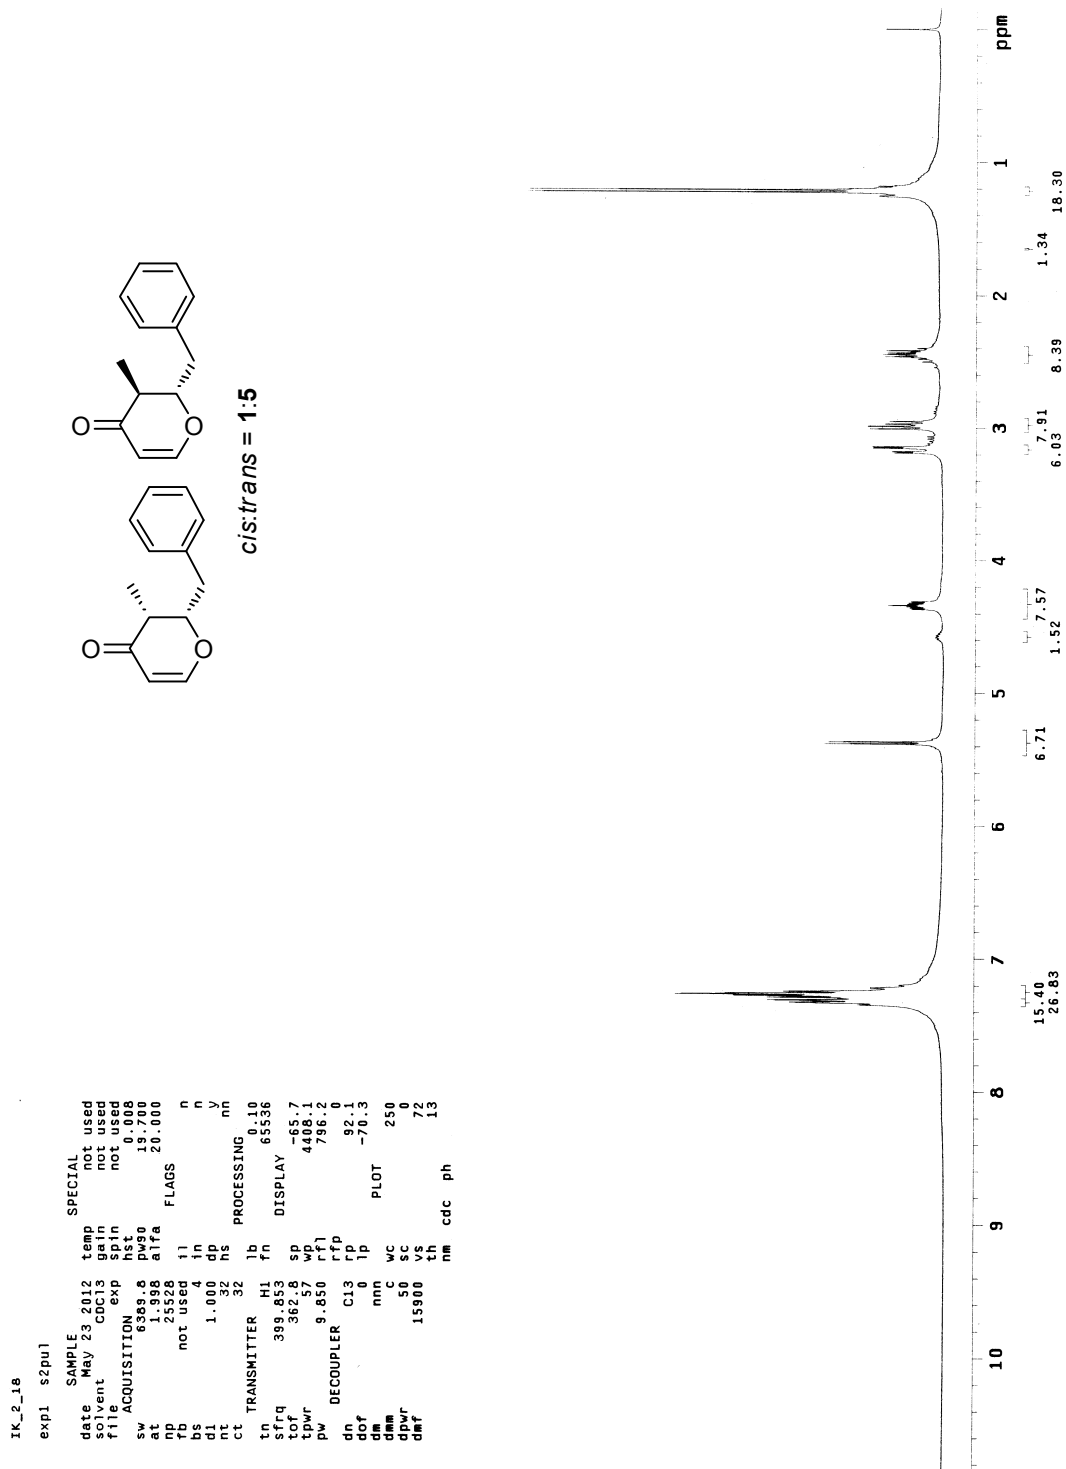

<sup>13</sup>C NMR spectrum of 17

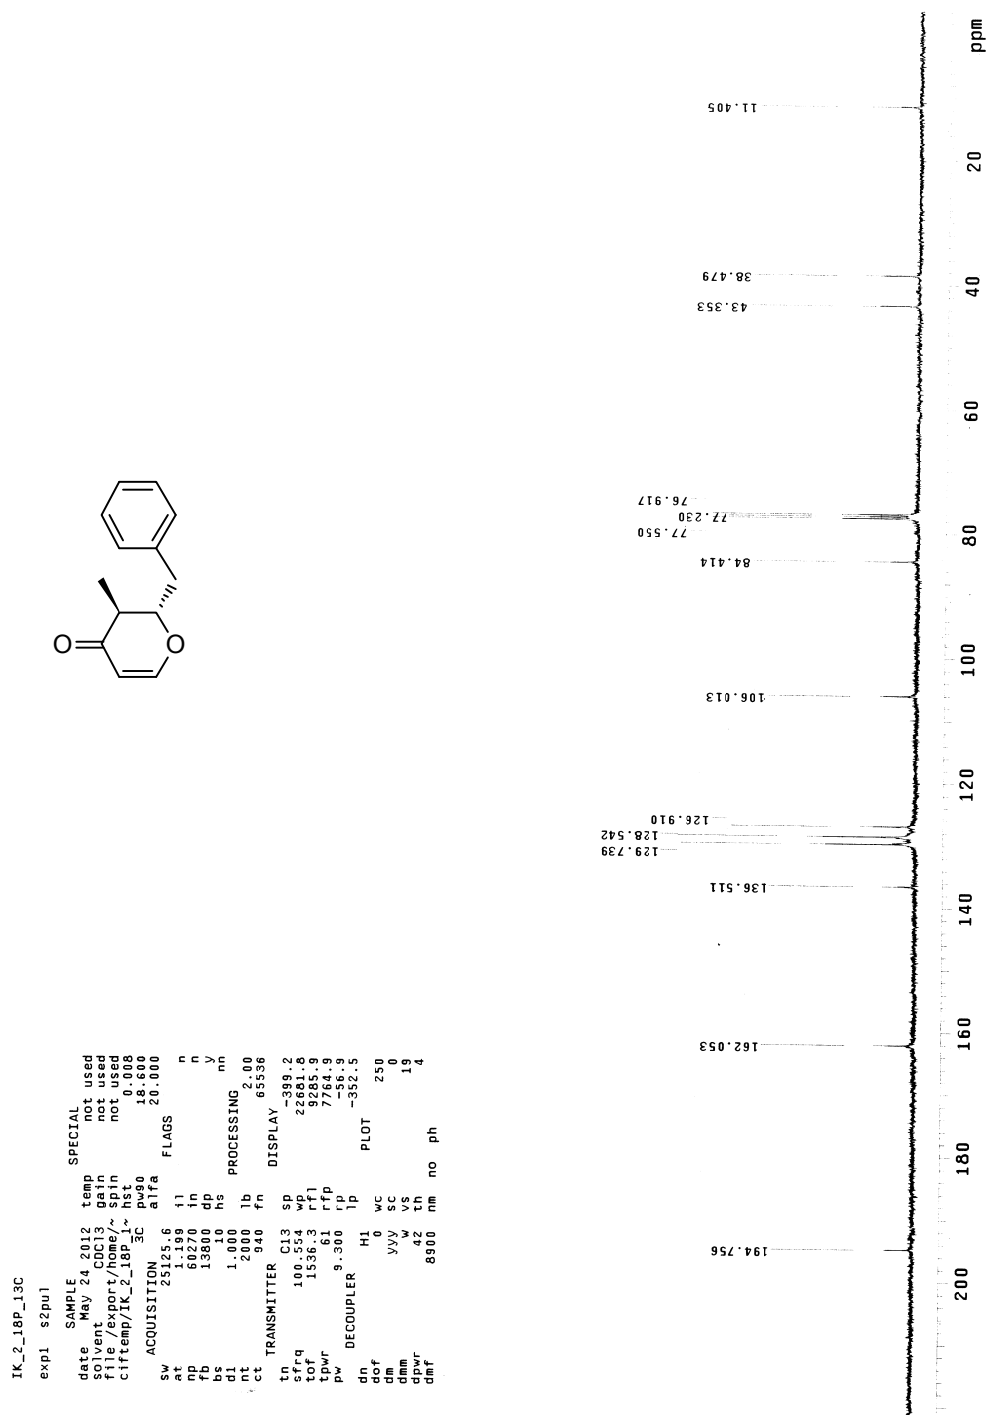



### $^1\text{H}$ NMR spectrum of 18

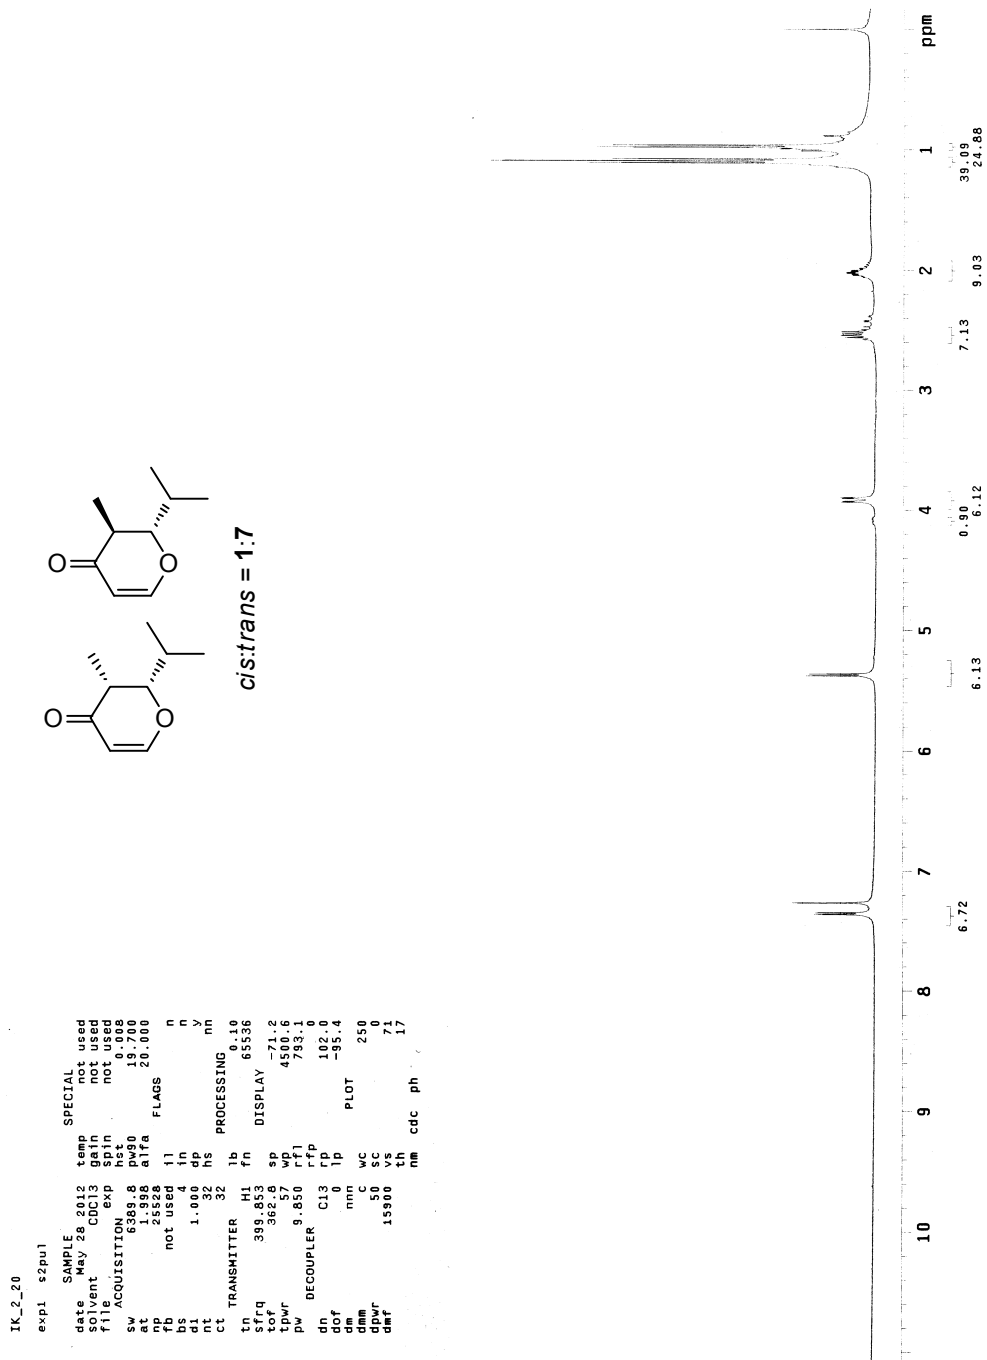

### <sup>13</sup>C NMR spectrum of 18

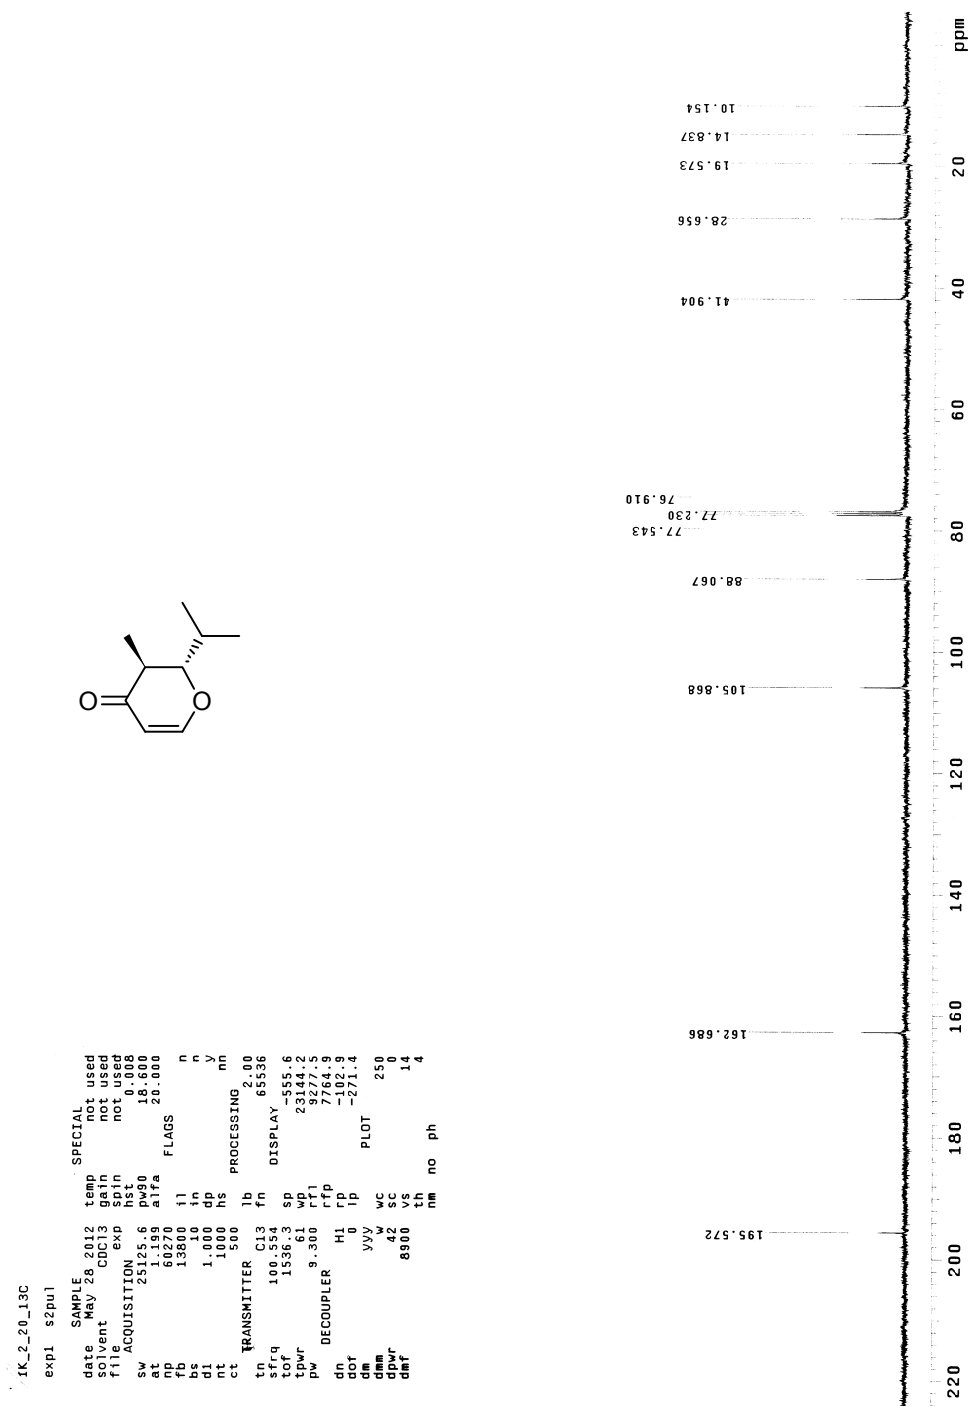

Supplement: c2ra21468g.pdf [file c2ra21468g.pdf]
