# Supplementary material for: Synthesis of 2,3-dihydro-4-pyranones from epoxides via intermolecular [4+2] cycloaddition reaction
Source: Royal Society of Chemistry journal article supplement (doi:10.1039/c2ra21468g), 2012-01-01

## **Synthesis of 2,3-Dihydro-4-pyranones from Epoxides via Intermolecular [4+2] Cycloaddition Reaction**

Kiran Indukuri, Somasekhar Bondalapati, Sabera Sultana and Anil K. Saikia\*

### **HRMS Spectra**

## HRMS spectra of 1

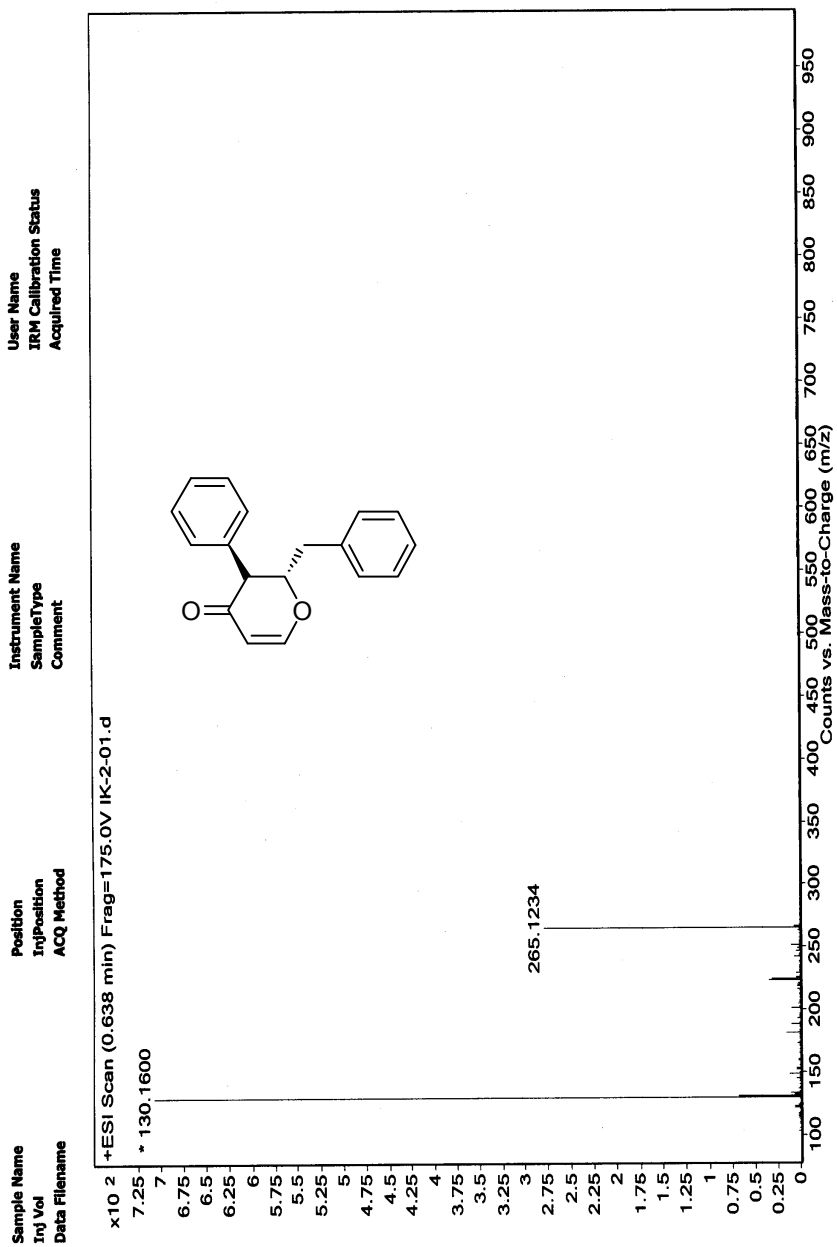

## HRMS spectra of 2

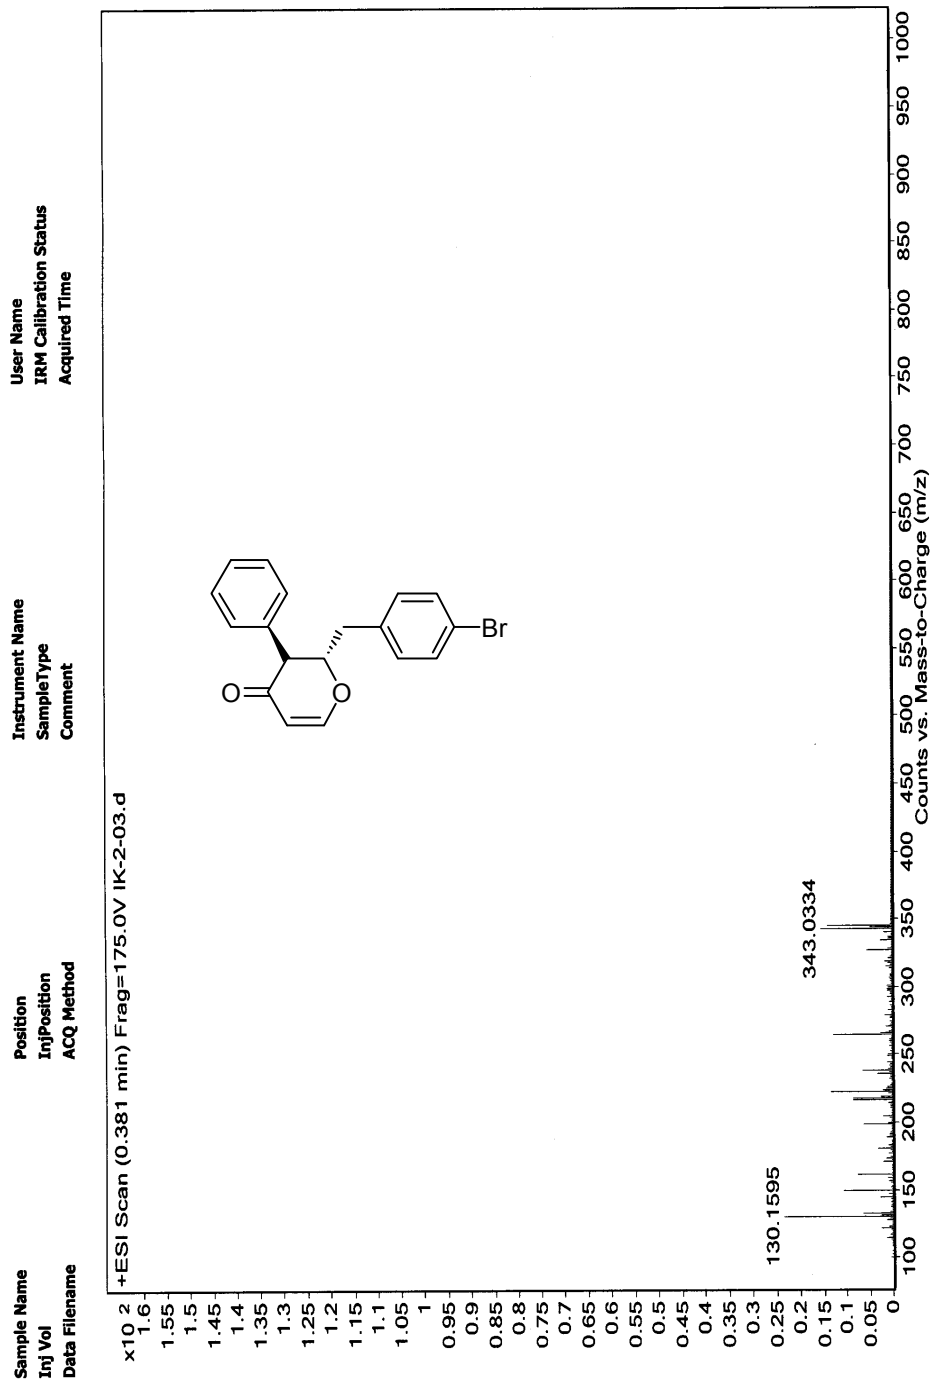

### HRMS spectra of 3

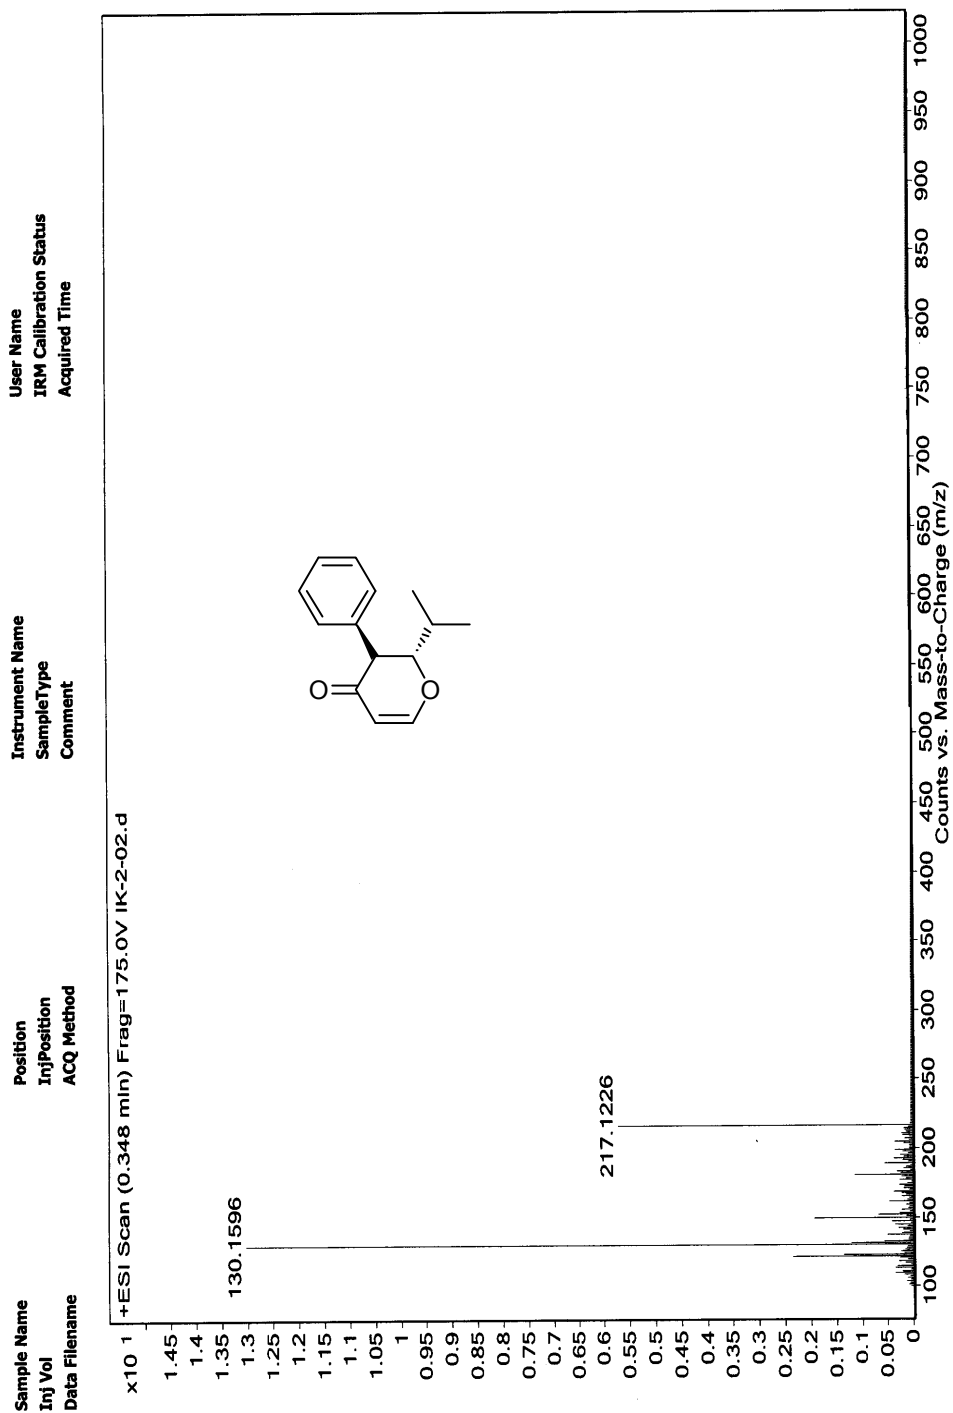

## HRMS spectra of 4

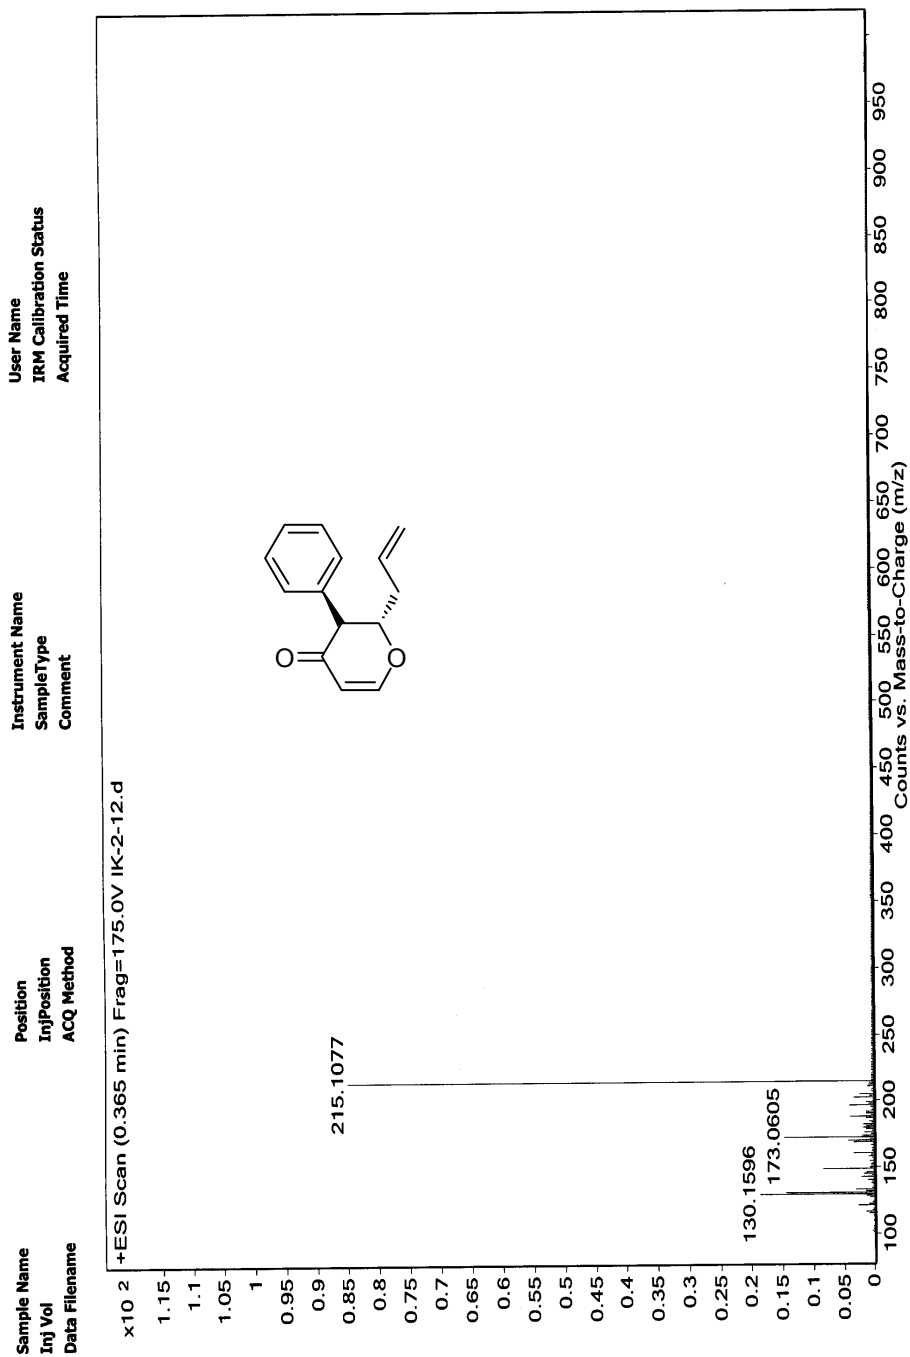

## HRMS spectra of 5

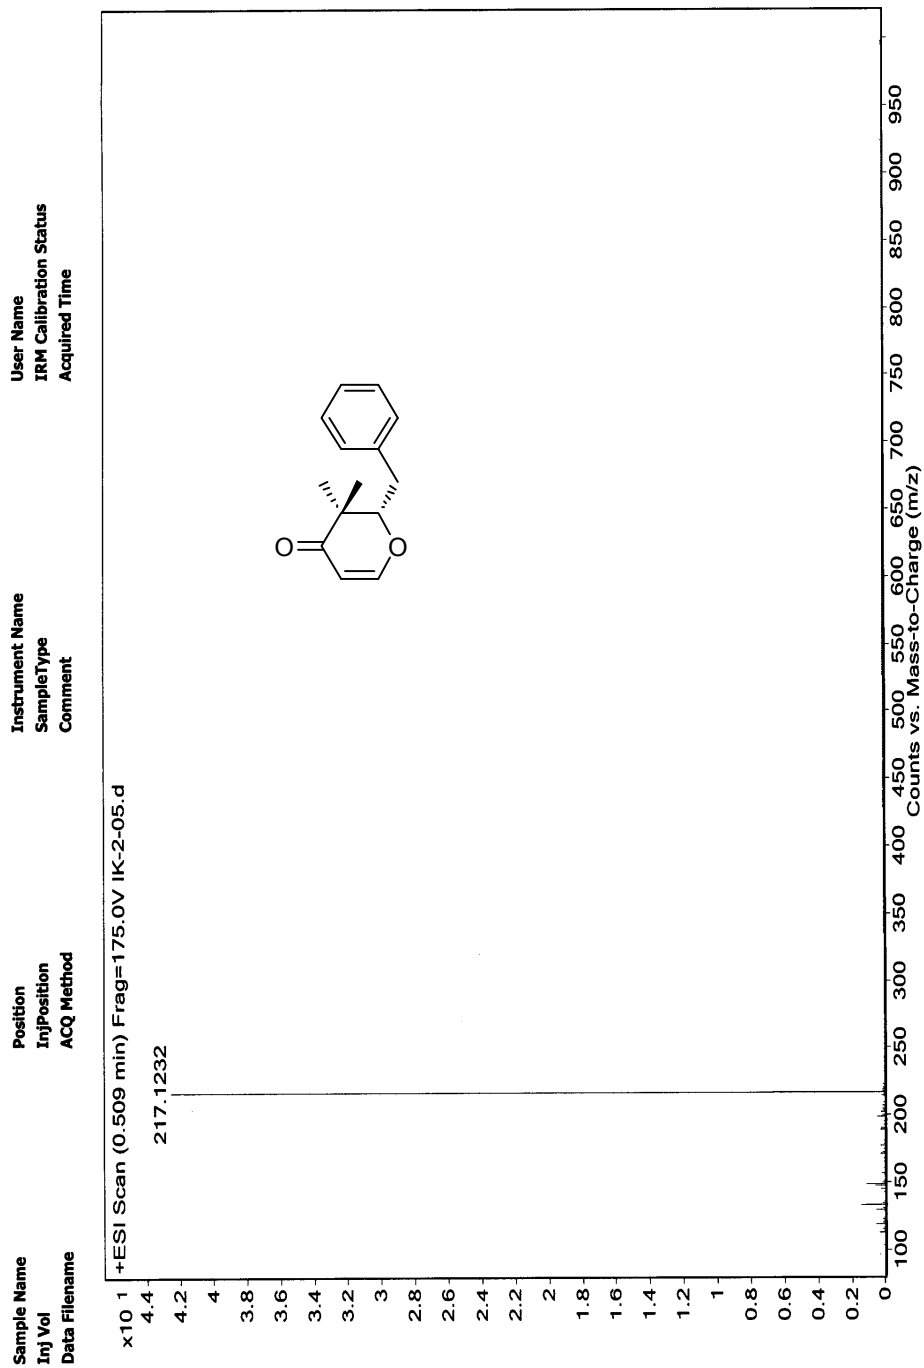

## HRMS spectra of 6

0  
p.1

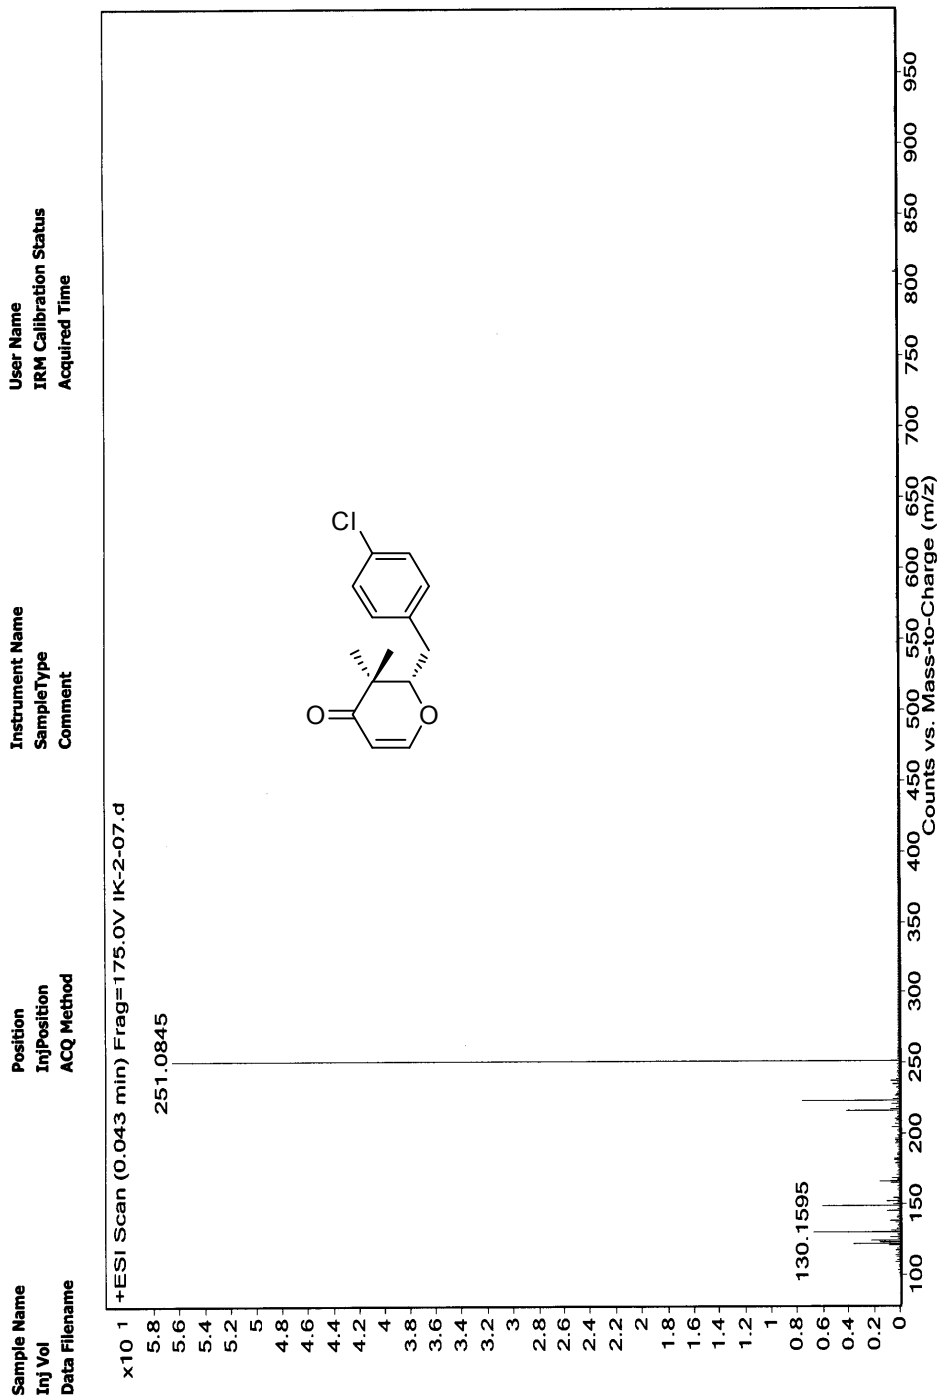

## HRMS spectra of 7

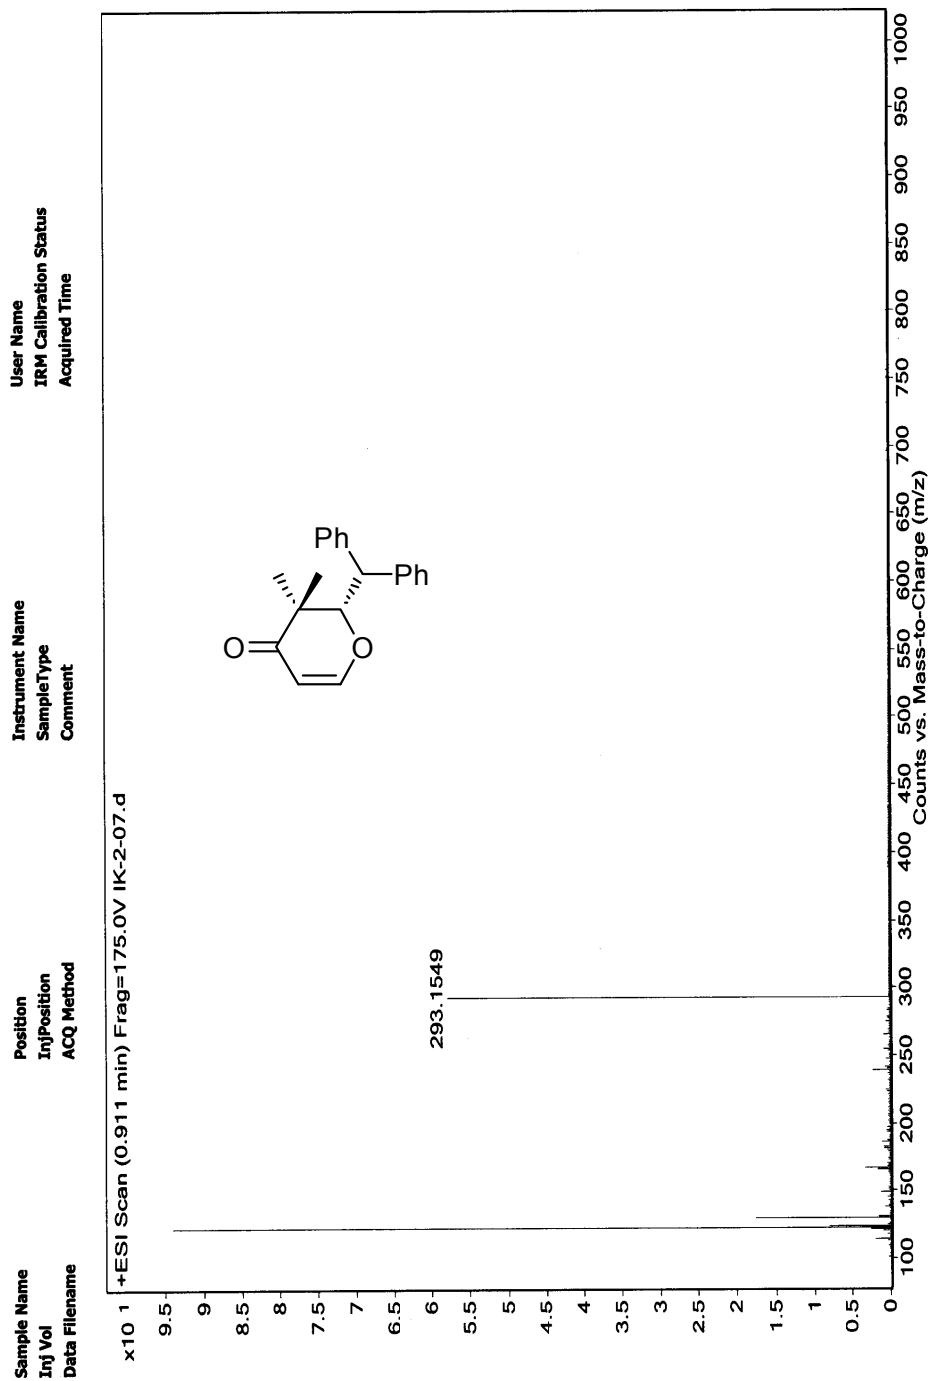



### HRMS spectra of 8

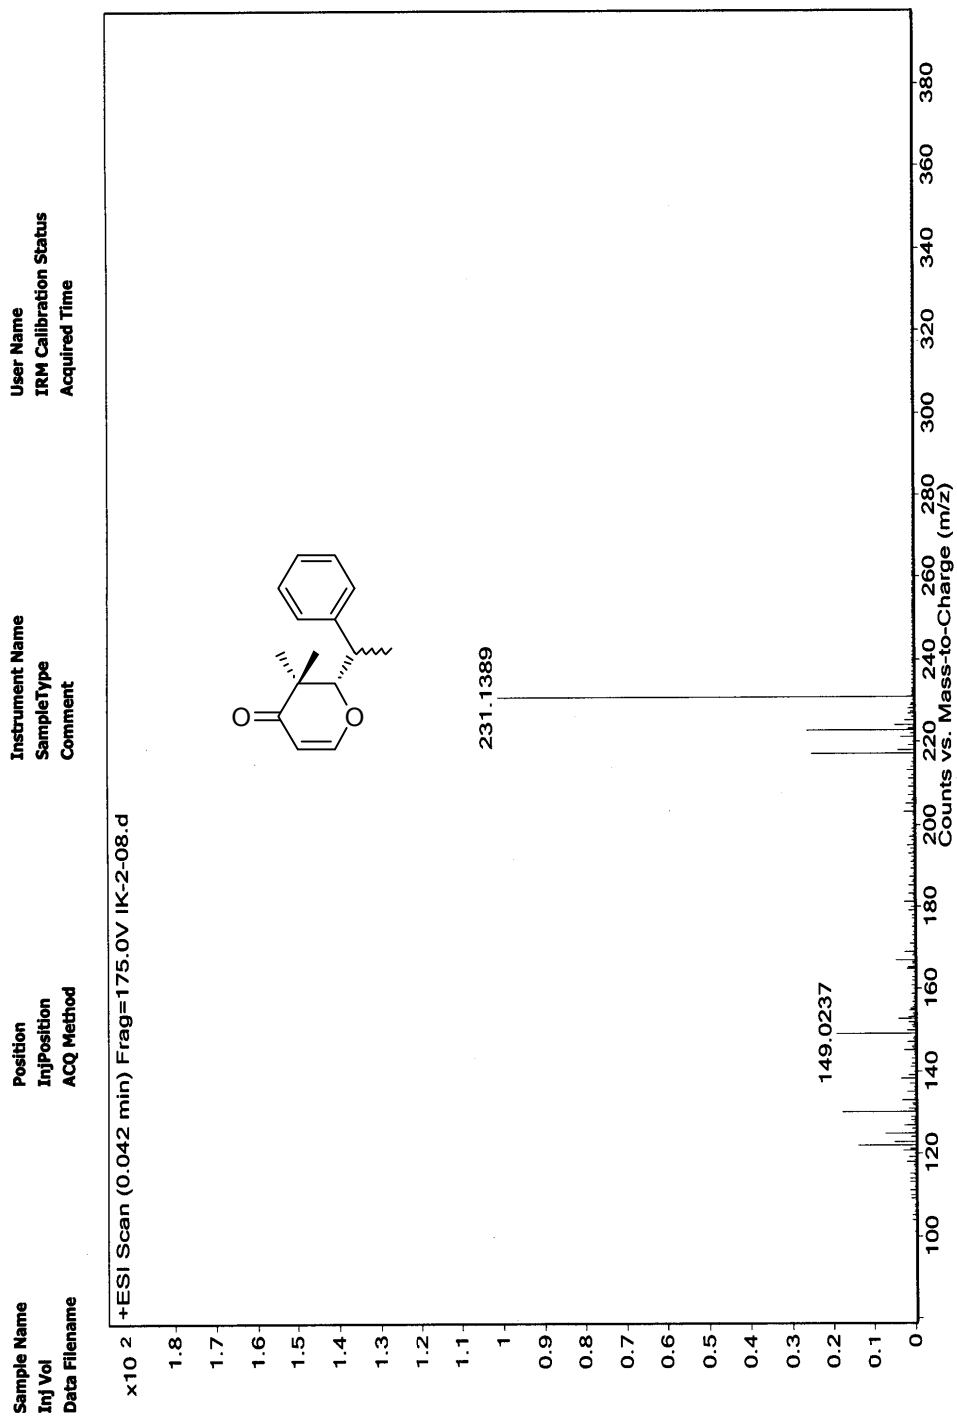

## HRMS spectra of 9

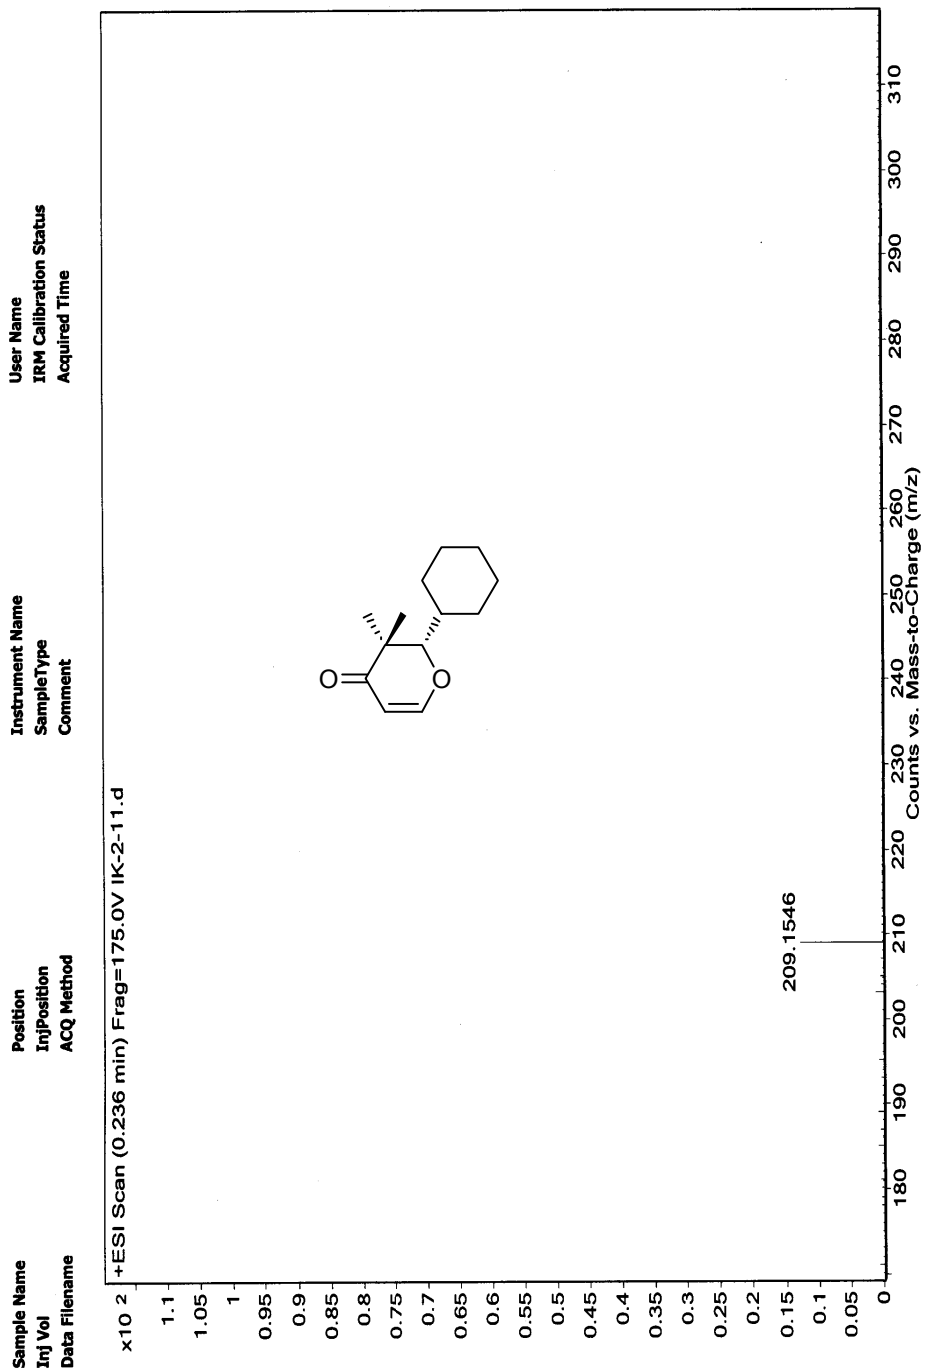

### HRMS spectra of 13

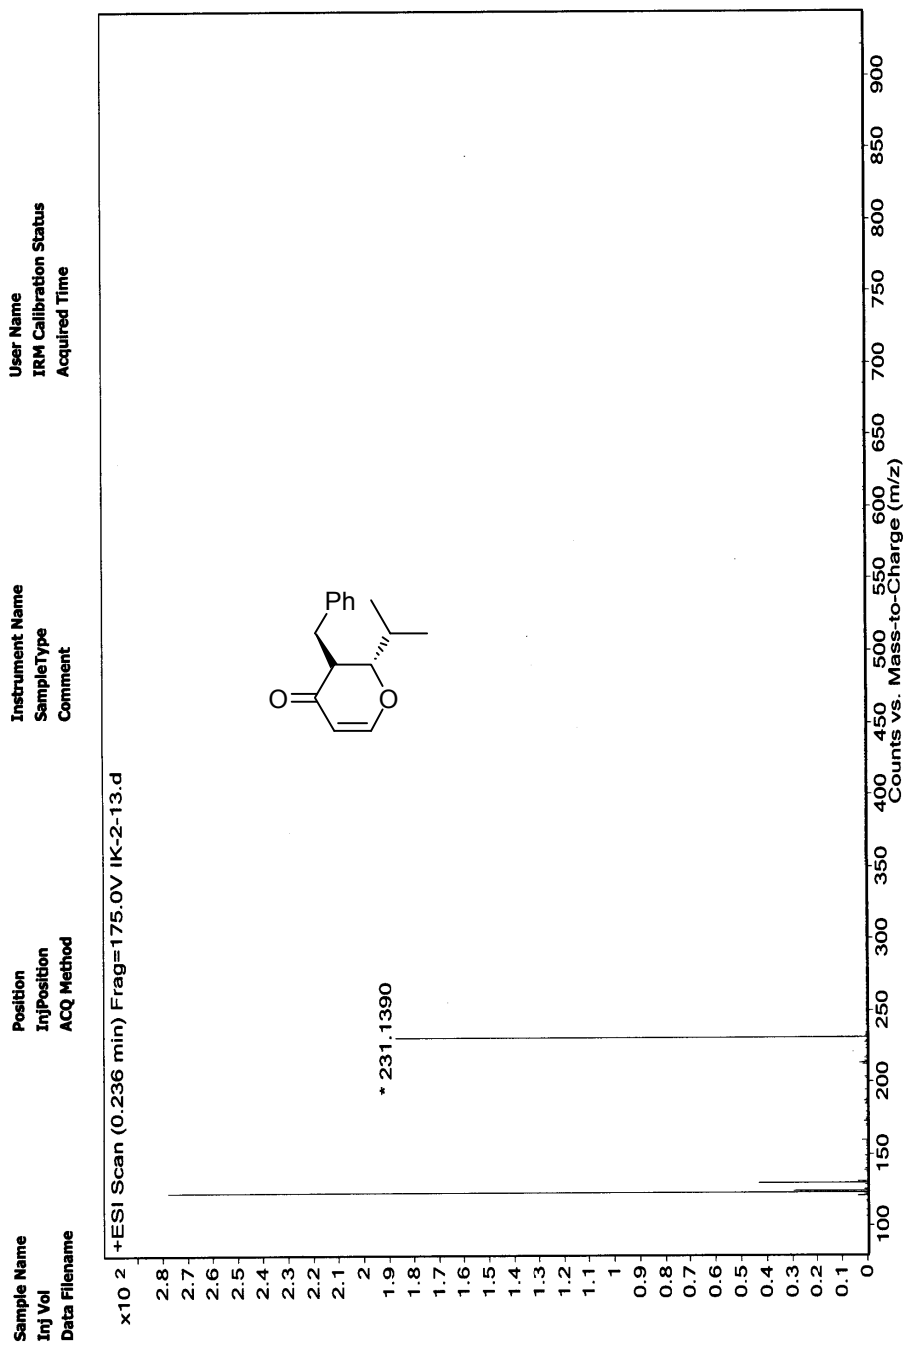

## HRMS spectra of 14

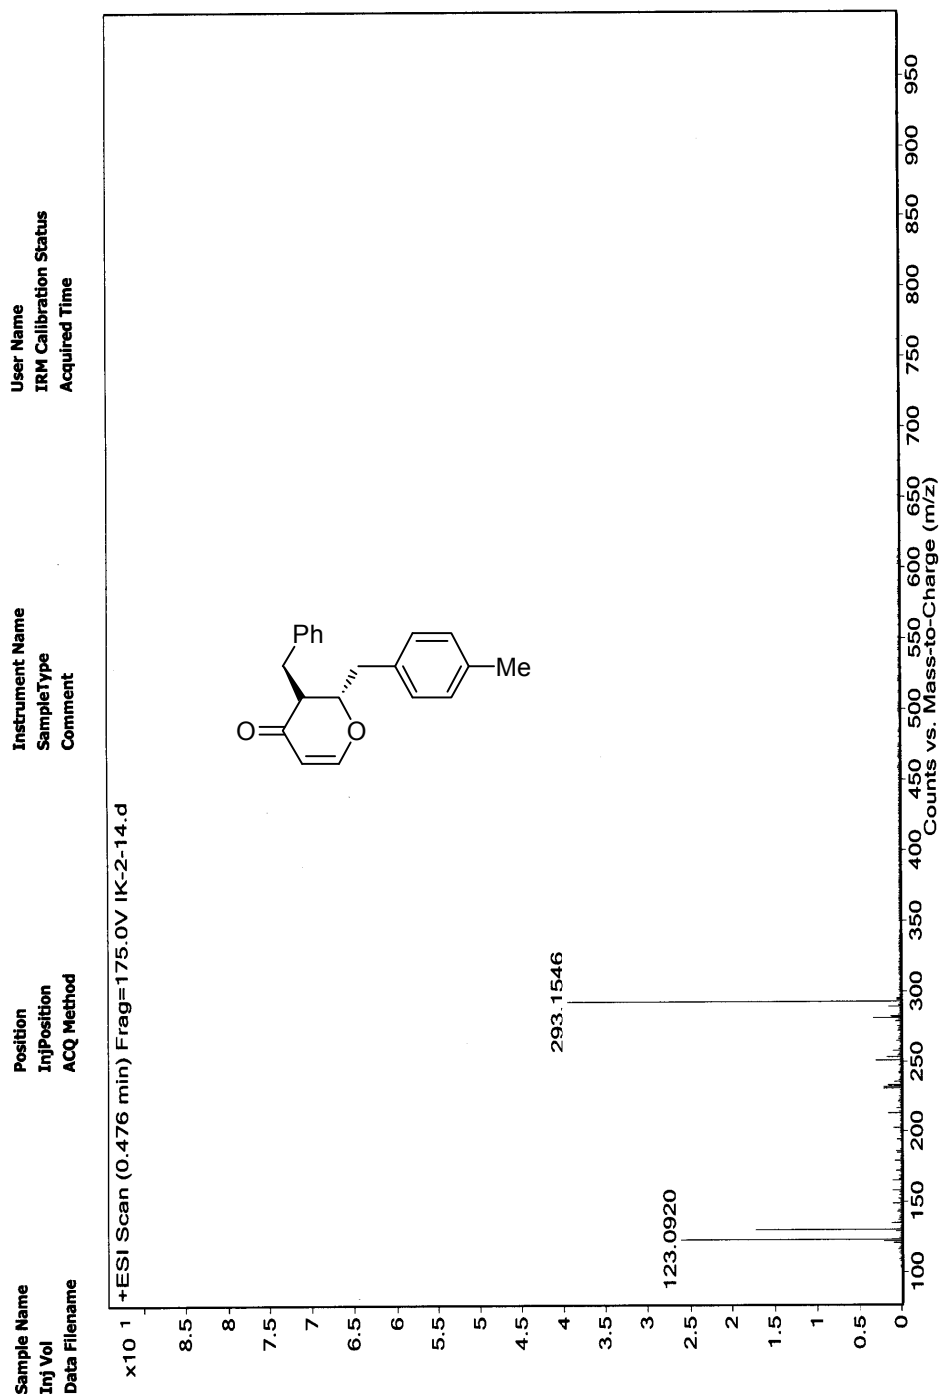

## HRMS spectra of 15

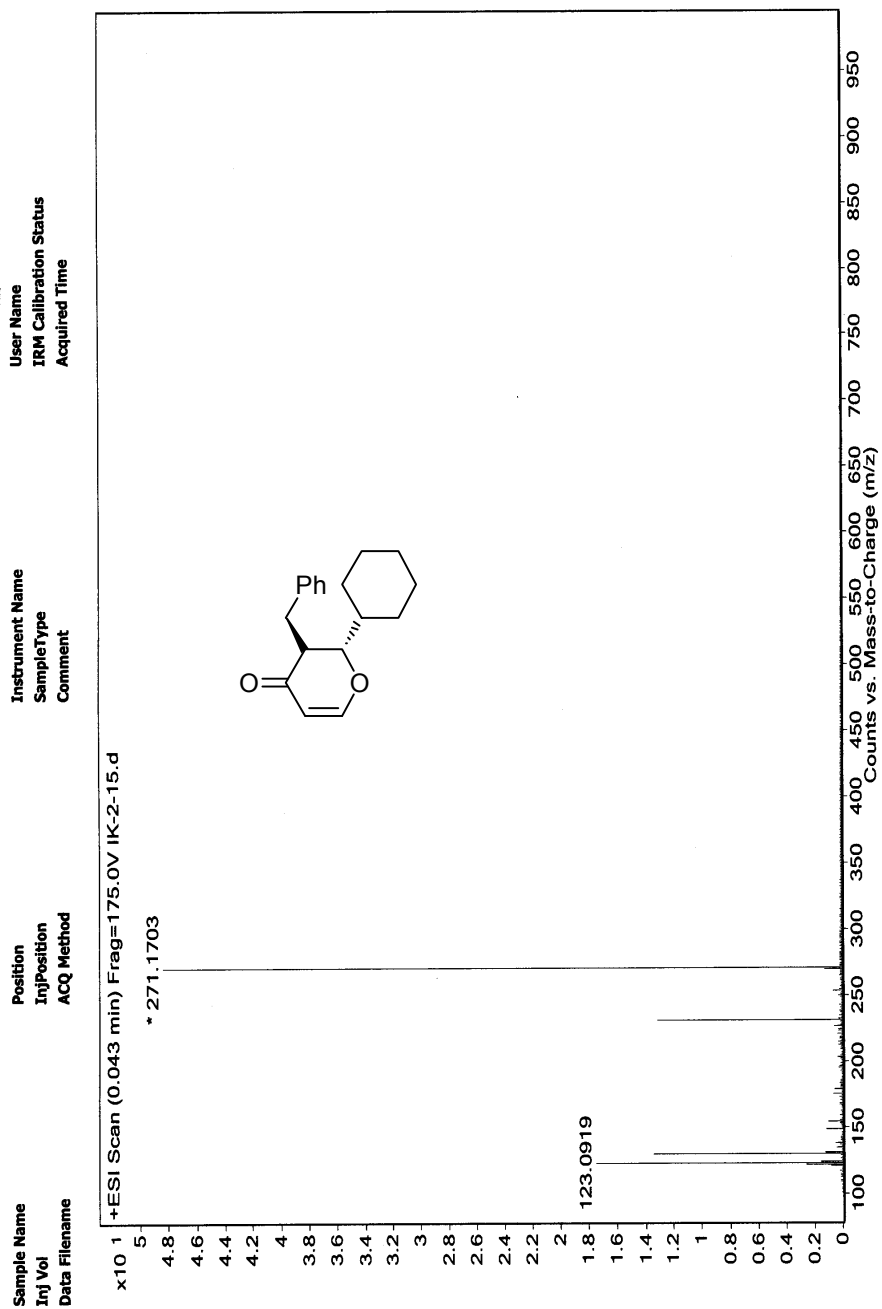

## HRMS spectra of 16

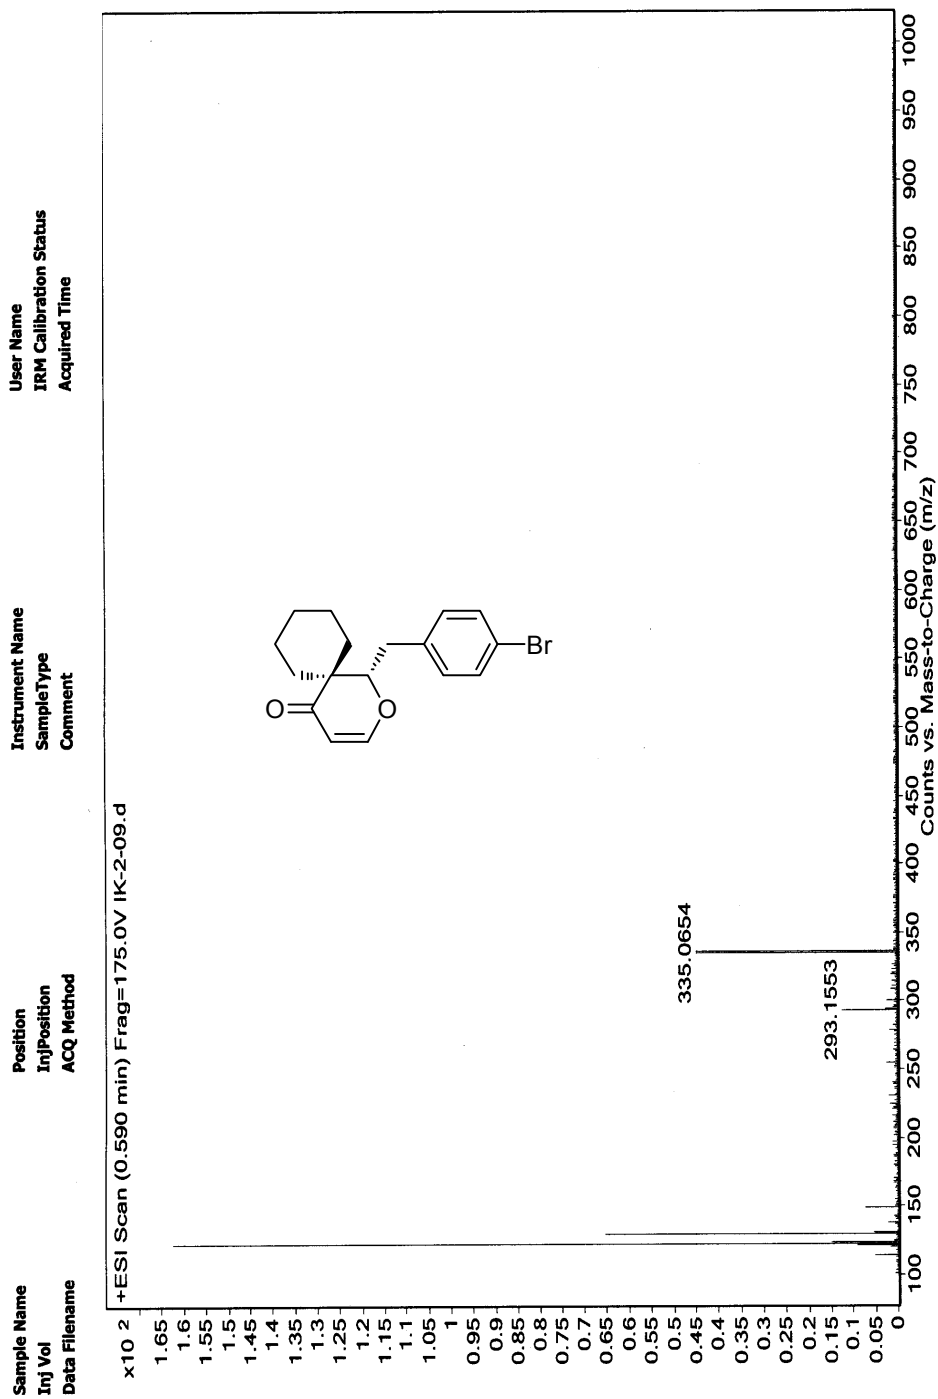

## HRMS spectra of 17

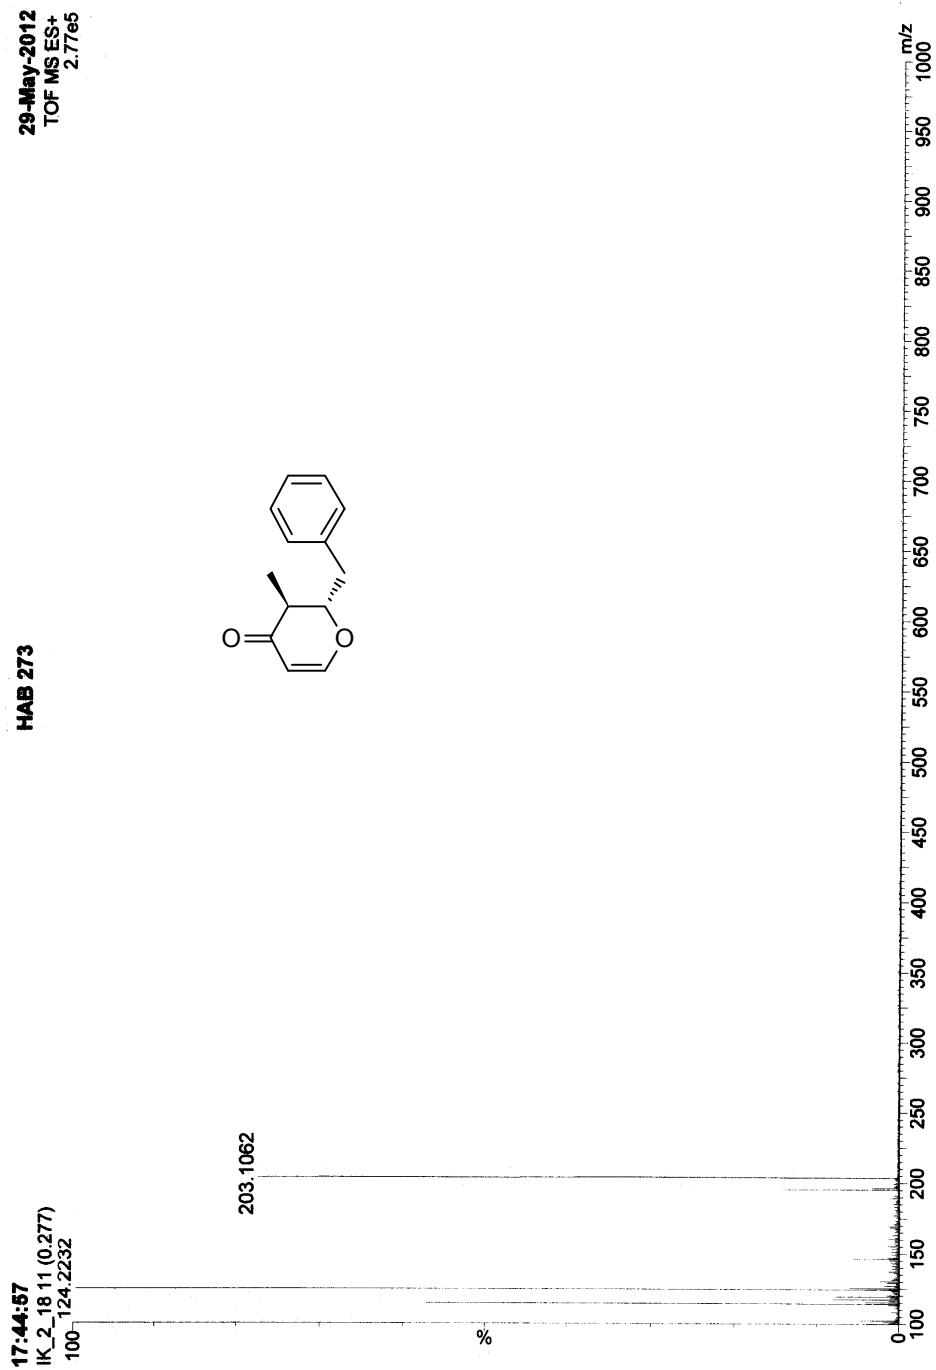

## HRMS spectra of 18

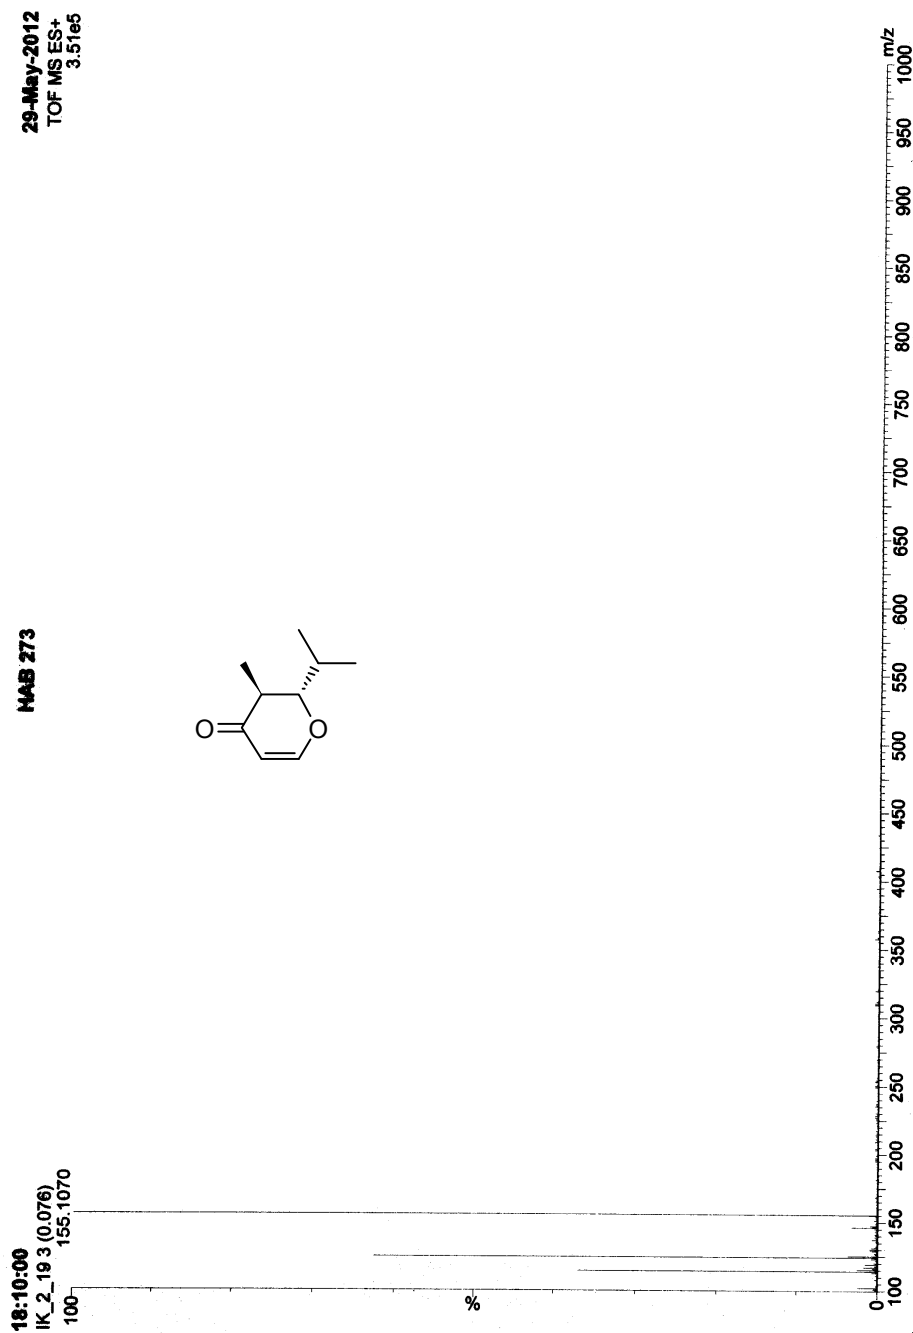

Supplement: c2ra21468g_2.pdf [file c2ra21468g_2.pdf]
